# Mapping the Macrostructure and Microstructure of the in vivo Human Hippocampus using Diffusion MRI

Bradley G. Karat<sup>1,2</sup>, Jordan DeKraker<sup>1,3</sup>, Uzair Hussain<sup>4</sup>, Stefan  
Köhler<sup>5</sup>, Ali R. Khan<sup>1,6</sup>

<sup>1</sup>Robarts Research Institute, Schulich School of Medicine and Dentistry, University of Western  
Ontario, Canada, <sup>2</sup>Neuroscience Graduate Program, University of Western Ontario, Canada,  
<sup>3</sup>Montreal Neurological Institute, McGill University, Montreal, Quebec, Canada, <sup>4</sup>University  
Health Network, Toronto, Ontario, Canada, <sup>5</sup>Department of Psychology, University of Western  
Ontario, Canada, <sup>6</sup>Western Institute for Neuroscience, University of Western Ontario, Canada,

## Data and code availability

The *HippUnfold* software is openly available and can be found at  
<https://github.com/khanlab/hippunfold>. Code used for the study can be found at  
[https://github.com/Bradley-Karat/Hippo\\_Macro\\_Micro](https://github.com/Bradley-Karat/Hippo_Macro_Micro).

Data were provided [in part] by the Human Connectome Project, WU-Minn  
Consortium (Principal Investigators: David Van Essen and Kamil Ugurbil;  
1U54MH091657) funded by the 16 NIH Institutes and Centers that support the  
NIH Blueprint for Neuroscience Research; and by the McDonnell Center for  
Systems Neuroscience at Washington University;  
<https://www.humanconnectome.org/study/hcp-young-adult/document/1200-subjects-data-release>

38 **Abstract**

39 The hippocampus is classically divided into mesoscopic subfields which contain varying  
40 microstructure that contribute to their unique functional roles. It has been challenging to  
41 characterize this microstructure with current MR based neuroimaging techniques. In this work,  
42 we used diffusion MRI and a novel surface-based approach in the hippocampus which revealed  
43 distinct microstructural distributions of neurite density and dispersion, T1w/T2w ratio as a proxy  
44 for myelin content, fractional anisotropy, and mean diffusivity. We used the Neurite Orientation  
45 Dispersion and Density Imaging (NODDI) model optimized for gray matter diffusivity to  
46 characterize neurite density and dispersion. We found that neurite dispersion was highest in the  
47 Cornu Ammonis (CA) 1 and subiculum subfields which likely captures the large heterogeneity  
48 of tangential and radial fibers, such as the Schaffer collaterals, perforant path, and pyramidal  
49 neurons. Neurite density and T1w/T2w were highest in the subiculum and CA3 and lowest in  
50 CA1, which may reflect known myeloarchitecture differences between these subfields. Using a  
51 simple logistic regression model, we showed that neurite density, dispersion, and T1w/T2w  
52 measures provided good separability across the subfields, suggesting that they may be sensitive  
53 to the known variability in subfield cyto- and myeloarchitecture. We report macrostructural  
54 measures of gyrification, thickness, and curvature that were in line with ex vivo descriptions of  
55 hippocampal anatomy. We employed a multivariate orthogonal projective non-negative matrix  
56 factorization (OPNNMF) approach to capture co-varying regions of macro- and microstructure  
57 across the hippocampus. The clusters were highly variable along the medial-lateral (proximal-  
58 distal) direction, likely reflecting known differences in morphology, cytoarchitectonic profiles,  
59 and connectivity. Finally, we show that by examining the main direction of diffusion relative to  
60 canonical hippocampal axes, we could identify regions with stereotyped microstructural  
61 orientations that may map onto specific fiber pathways, such as the Schaffer collaterals,  
62 perforant path, fimbria, and alveus. These results highlight the value of combining in vivo  
63 diffusion MRI with computational approaches for capturing hippocampal microstructure, which  
64 may provide useful features for understanding cognition and for diagnosis of disease states.

65  
66 **Keywords:** Hippocampus; Subfields; Microstructure; Neurite Density; Neurite Dispersion;  
67 Diffusion MRI

68  
69  
70  
71  
72  
73  
74  
75  
76

## 77 **1. Introduction**

78 The hippocampus is classically divided into structurally distinct mesoscopic subfields according  
79 to differences in cyto-, myelo-, and chemoarchitecture (Duvernoy et al., 2013; Ding & Van  
80 Hoesen, 2015). The neuronal circuitry that compose the microstructure of the hippocampus exist  
81 within and across these subfields. For example, the pyramidal neurons that exist within the  
82 Cornu Ammonis (CA) and subiculum subfields have apical and basal dendrites which project  
83 across the laminae, while their axons project to the alveus, a white matter bundle adjoining the  
84 hippocampus. The trisynaptic pathway is the major circuitry component which connects the  
85 subfields of the hippocampus. The entorhinal cortex connects to the dentate gyrus (DG) and  
86 other subfields through the myelinated perforant path. The DG then projects to the pyramidal  
87 neurons of CA3 through the mossy fibers, which then project to CA1 through the largely  
88 unmyelinated Schaffer collaterals. Finally, CA1 projects to the subiculum and back to the  
89 entorhinal cortex as a large hippocampal efferent. Hippocampal microstructure is key in  
90 producing unique cognitive functions such as memory formation and storage and spatial  
91 navigation among others (Voss et al., 2017; Goodroe et al., 2018; Horner et al., 2015).  
92 Furthermore, the hippocampus is typically one of the earliest aberrant structures in many disease  
93 states, where specific microstructural properties are differentially afflicted or spared (Moodley &  
94 Chan, 2014; Dhikav & Anand, 2012; Small et al., 2011). While much work has addressed  
95 volumetric characterization of the hippocampus and its subfields, understanding hippocampal  
96 microstructure can provide key insights into its complex cognitive functions as well as its early  
97 deterioration in disease.

98         Diffusion magnetic resonance imaging (dMRI) is a particular technique which holds  
99 promise in probing the hippocampal circuitry by sensitizing the measured MRI signal to the  
100 movement of water molecules, which diffuse more readily parallel to microstructure. Several  
101 models have been proposed that attribute measures of the dMRI signal to compartments which

102 have varying diffusivity environments (Assaf et al., 2008; Assaf & Basser, 2005; Zhang et al.,  
103 2012). One of the earliest and most widely used models proposed by Basser et al. (1994) is  
104 diffusion tensor imaging (DTI). DTI estimates quantitative parameters such as fractional  
105 anisotropy (FA - a measure of the anisotropy of diffusion), mean diffusivity (MD – magnitude of  
106 diffusion), and the ellipsoidal orientation of the diffusion process. However, DTI has some  
107 notable limitations. At increasing b-values (approximately greater than 1000-1500  $s/mm^2$ ) there  
108 is contribution from multiple compartments with varying diffusivities (such as restricted intra-  
109 cellular water), which goes beyond the monoexponential signal modelled by DTI (Assaf &  
110 Cohen. 2000). As well, regions of crossing fibers result in planar DTI ellipsoids with understated  
111 FA values (Campbell et al., 2005). Furthermore, DTI measures are sensitive to multiple  
112 microstructural properties at the same time, decreasing their specificity (Pierpaoli et al., 1996).  
113 Other models aim to utilize increasingly complex diffusion acquisitions to relate the diffusion  
114 signal attenuation to varying sets of biophysically motivated compartments.

115         One popular compartment model is Neurite Orientation Dispersion and  
116 Density Imaging (NODDI), which aims to provide a biophysical interpretation of the diffusion  
117 signal (Zhang et al., 2012). NODDI assumes that three microstructural environments consisting  
118 of an intra-cellular, extra-cellular, and cerebrospinal fluid (CSF) compartment contribute to the  
119 diffusion signal. The intra-cellular compartment is modeled as a set of infinitely anisotropic  
120 sticks (diffusion can only be parallel to the main orientation of the stick), while the extra-cellular  
121 compartment is modeled as a zeppelin (or cylindrically symmetric tensor) with hindered  
122 diffusion perpendicular to its main axis. The CSF compartment is modeled as a sphere with  
123 gaussian isotropic diffusion. Diffusion is assumed to be contained separately within each  
124 compartment, where the resulting signal is the sum from all compartments. NODDI aims to  
125 overcome the limitations of DTI by providing microstructural scalars such as the neurite density  
126 index (NDI) and orientation dispersion index (ODI) which are sensitive to fiber crossings and are



127 biophysically grounded (Zhang et al., 2012). NDI is meant to represent the volume fraction of  
128 the intra-cellular compartment, which is believed to correspond to the density of dendrites,  
129 axons, and other “stick” like processes in a voxel. ODI is meant to capture the essence of the  
130 orientation distribution of the diffusion signal, where more complex or disperse microstructural  
131 configurations correspond to a higher ODI value.

132 Contemporary work has attempted to examine hippocampal microstructure with both DTI  
133 and NODDI. Some such studies have found age-related changes of hippocampal microstructure  
134 by averaging NODDI measures within subfields (Radhakrishnan et al., 2020) while others have  
135 shown regionally specific changes using DTI (Yassa et al., 2010). Recent work has also begun to  
136 use measures derived from structural MRI to interrogate microstructural characteristics, such as  
137 the ratio of T1-weighted over T2-weighted signal as a correlate of myelin (Glasser & Van Essen,  
138 2011; Glasser et al., 2014). These measures may be useful to capture the myelinated intra-  
139 hippocampal circuitry like the perforant path. A recent study investigated the variation of DTI  
140 and intra-cortical myelin through the ratio of T1w/T2w images across the hippocampus using  
141 non-negative matrix factorization, however, they did not make quantitative comparisons of  
142 microstructure within and across the subfields (Patel et al., 2020). As well, they note the limited  
143 specificity nature of the DTI and T1w/T2w metrics investigated. A recent study examined the  
144 distribution of NODDI metrics and cortical thickness across the entire cerebral cortex including  
145 the hippocampus by averaging metrics across all subjects within each cortical parcel (Fukutomi  
146 et al., 2018). Thus, they only examined coarse-grained averages across the entire hippocampal  
147 volume. The spatial distributions of NODDI and DTI measures have not been extensively  
148 investigated within the hippocampal subfields and across its longitudinal axis.

149 The orientation and trajectory of the hippocampal circuitry including the trisynaptic  
150 circuit has been probed previously using tractography and polarized light imaging (PLI). Ex vivo  
151 work has indeed resolved major parts of the hippocampal circuitry using dMRI tractography

152 (Beaujoin et al., 2018) and PLI (Zeineh et al., 2017) in a small number of samples. While these  
153 studies serve as a close to ground-truth reference for the orientation of hippocampal circuitry, a  
154 difficult step has been recapitulation of this circuitry in vivo. Some in vivo work has attempted to  
155 use DTI to capture parts of the trisynaptic circuit such as the perforant path (Yassa et al., 2010)  
156 or the whole hippocampal circuitry (Zeineh et al., 2012). However, it is unclear whether the  
157 found trajectories are anatomically valid. Furthermore, at lower resolutions, tracts can be  
158 spurious requiring complex acquisition and correction schemes, and since acquisitions can vary  
159 across studies, tractography practically always requires separate optimization of its parameters  
160 (Zeineh et al., 2012). Thus, understanding hippocampal microstructure in vivo may benefit from  
161 a simpler characterization of the orientation of hippocampal circuitry with reference to metrics  
162 derived from common models like NODDI within and across the subfields.

163 In the current study, we examined the spatial distribution of NODDI and DTI metrics,  
164 T1w/T2w ratio, and macrostructural features of thickness, gyrification, and curvature across the  
165 hippocampus using high-resolution in vivo human connectome project (HCP) data (Van Essen et  
166 al., 2013), something that has not been extensively investigated. We aimed to examine if the  
167 microstructural metrics systematically vary across the cytoarchitectonic defined subfields.  
168 Furthermore, we used Orthogonal Projective Non-Negative Matrix Factorization (OPNNMF) as  
169 a multivariate approach to capture regions of the hippocampus where these metrics co-vary. We  
170 aimed to consider the current OPNNMF representation of disparate macro- and microstructural  
171 metrics under the framework of previous research which has suggested modes of hippocampal  
172 organization along its medial-lateral (across subfields) and anterior-posterior (longitudinal) axes  
173 (Genon et al., 2021; Robinson et al., 2015; Zhong et al., 2019; Cheng et al., 2020; Plachti et al.,  
174 2019; Plachti et al., 2020; Patel et al., 2020, DeKraker et al., 2020). While most hippocampus  
175 representations use voxel-based approaches, we utilized a novel surface-based approach called  
176 *HippUnfold* (DeKraker et al., 2018; DeKraker et al., 2022). Much like in the neocortex, surface-

177 based methods are better suited to account for interindividual differences in tissue curvature and  
 178 digitation than voxel-based approaches (DeKraker et al., 2022; DeKraker et al., 2021). Aligning  
 179 hippocampi on a 2D surface preserves topology and the known contiguity of subfields, allowing  
 180 for improved anatomical detail to be captured. Finally, hippocampal gray matter shows a laminar  
 181 distribution similar to that of other cortical areas with large radial and tangential neurite  
 182 components, although the highly curved structure of the hippocampus is reflected in the  
 183 complexity of its neurite orientations. Importantly, these neurite orientations tend to be highly  
 184 aligned along one of the axes of the hippocampus that span the anterior-posterior (AP  
 185 longitudinal), proximal-distal (PD - across subfields), or inner-outer (across laminae) directions  
 186 (Figure 1A and B) (Zeineh et al., 2017; Nieuwenhuys et al., 2008; Duvernoy et al., 2013). Thus,  
 187 we also aimed to determine if the known stereotyped orientations of microstructure can be  
 188 elucidated by analyzing the primary direction of diffusion along each of the axes in vivo, as  
 189 depicted in Figure 1B.

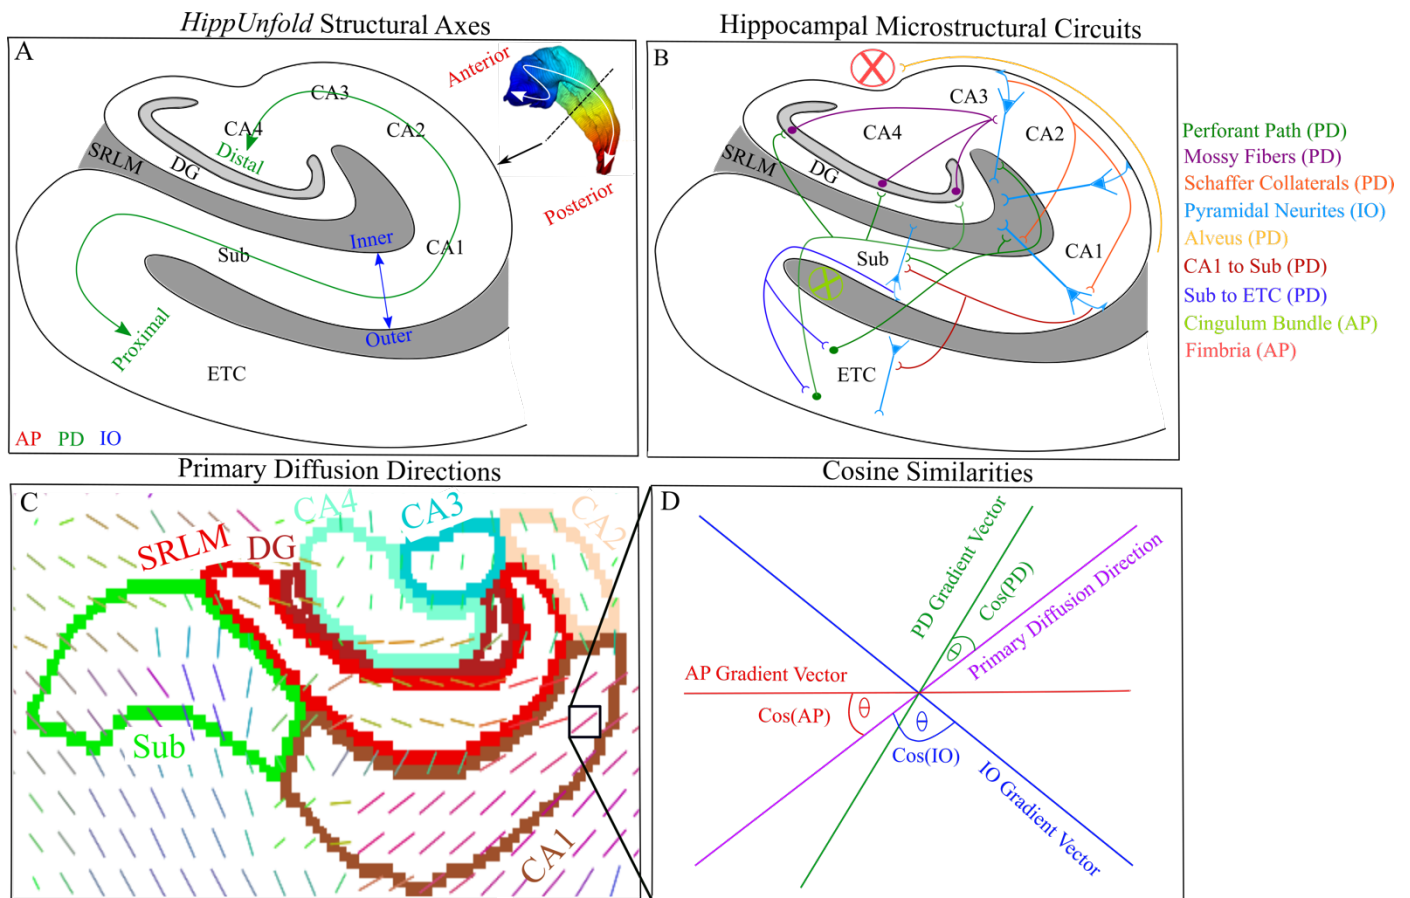

190 **Figure 1.** Depiction of hippocampal structural axes, the stereotyped organization of  
191 microstructure, and diffusion vectors of the hippocampus. (A) A coronal slice depicting the  
192 structural axes of the hippocampus defined as anterior-posterior (AP), proximal-distal (PD), and  
193 inner-outer (IO) provided by *HippUnfold*. The inner gray area corresponds to the SRLM, while  
194 the rest of the uncoloured regions correspond to the stratum pyramidale and stratum oriens  
195 layers. The white arrow in the top right inset depicts the orientation of the anterior-posterior axis.  
196 The colour of the hippocampal surface is the anterior-posterior Laplace coordinates. Finally, the  
197 black arrow depicts the intended level of the coronal slice for the cartoon depiction. (B)  
198 Simplified cartoon depiction of known microstructural circuits within the hippocampus and their  
199 approximate main orientation relative to the hippocampus, defined by the colour coded legend  
200 on the right (Zeineh et al., 2017; Nieuwenhuys et al., 2008; Duvernoy et al., 2013). (C) Primary  
201 diffusion directions for one subject ( $\mu$  of the watson distribution from NODDI) overlaid on a  
202 coronal slice approximately through the hippocampal body. Coloured borders represent the  
203 hippocampal subfields provided by *HippUnfold*. (D) Pictorial example representing the NODDI  
204 and hippocampal axis vectors in a single voxel defined in (C). Cosine similarities are represented  
205 as the angle between the NODDI vector and each hippocampal vector, providing a measure of  
206 orientation coherence along each cardinal axis (see section 2.5). Sub - Subiculum, CA - Cornu  
207 Ammonis, DG - Dentate Gyrus, SRLM - Stratum Radiatum Lacunosum Moleculare, ETC -  
208 Entorhinal Cortex.

## 209 **2. Methods**

### 210 *2.1 Overview*

211 A subset of 100 unrelated subjects from the publicly available Human Connectome Project  
212 (HCP) 1200 dataset were used for this study (Van Essen et al., 2013). All 100 subjects were run  
213 through *HippUnfold* (DeKraker et al., 2022), a new automated tool for surface-based subfield  
214 segmentation and hippocampal unfolding (see section 2.3; DeKraker et al., 2018). The Laplacian

215 coordinates generated from *HippUnfold* within each subject were used to calculate gradient  
216 vector fields along each axis of the hippocampus (see section 2.5 & Figure 1A). NODDI and DTI  
217 metrics were calculated in each subject's native space using whole-brain diffusion images (see  
218 2.2 and 2.4). Cosine similarities between the NODDI orientational vector (defined as  $\mu$  of the  
219 Watson distribution; see section 2.4) and the vectors along each of the 3 axes (AP, PD, and IO)  
220 were calculated at each voxel. Furthermore, the T1w/T2w ratio was calculated as a proxy for  
221 myelin content. Macrostructural measures of curvature, gyrification, and thickness were  
222 calculated along the midthickness surface (middle of the hippocampal gray matter) of the  
223 hippocampus across all subjects. NODDI measures of ODI and NDI, DTI measures of FA and  
224 MD, and the cosine similarities were all sampled along the midthickness surface within each  
225 subject and averaged in unfolded space (DeKraker et al., 2018; DeKraker et al., 2022). Plots of  
226 NODDI and DTI metrics, cosine similarities, and macrostructure metrics across the midthickness  
227 surface were visualized as folded and unfolded surfaces. Logistic regression was performed at  
228 the level of subfield averages using the NODDI and T1w/T2w metrics to elucidate their  
229 variability across the subfields. Logistic regression was chosen due to its simplicity and  
230 interpretability. Finally, Orthogonal Projective Non-Negative Matrix Factorization (OPNNMF)  
231 was used to capture co-varying regions of the hippocampus and to examine the dimensions of  
232 macro- and microstructure hippocampal organization.

### 233 *2.2 Data acquisition and preprocessing*

234 We used the publicly available HCP young adult dataset (ages 22-35), which consisted of  
235 structural and diffusion MRI data for 1200 subjects (Van Essen et al., 2013). To avoid any biases  
236 caused by family structures, we chose the 100 unrelated subjects subset for analysis (mean age:  
237 27.52 years  $\pm$  3.47 years; F/M: 54/46). Data included T1-weighted (T1w) and T2-weighted  
238 (T2w) structural images at 0.7 mm<sup>3</sup> isotropic resolution and diffusion-weighted data at 1.25 mm<sup>3</sup>  
239 isotropic resolution. Structural images were obtained using a 3D MPRAGE sequence (TR-

240 2400ms, TE=2.14ms, TI=1000ms, FOV=224x224 mm). Diffusion images were obtained using a  
241 spin-echo echo-planar imaging sequence (b=0 (18 acquisitions), 1000, 2000, 3000s/mm<sup>2</sup>, 90  
242 diffusion-encoding directions, TR=5520ms, TE=89.5ms, FOV=210x180mm). Data used in the  
243 preparation of this work were obtained from the Human Connectome Project (HCP) database  
244 (Van Essen et al., 2013). In this work we utilized the preprocessed structural and diffusion  
245 images for the HCP dataset. Preprocessing of structural images included: gradient distortion  
246 correction, coregistration and averaging of repeated T1w and T2w runs using 6-DOF rigid  
247 transformation, initial brain extractions for T1w and T2w, field map distortion correction and  
248 registration of T2w with T1w images, bias field correction, and atlas registration. Preprocessing  
249 of diffusion images included: intensity normalization across runs, EPI distortion correction, eddy  
250 current and motion correction, gradient nonlinearity correction, and registration of the mean b0  
251 image to T1w native space. The full pre-processing pipeline for structural and diffusion images  
252 were published elsewhere (Andersson et al., 2015; Glasser et al., 2013; Jenkinson et al., 2002;  
253 Sotiropoulos et al., 2013) and can be found at the HCP website  
254 (<https://www.humanconnectome.org/study/hcp-young-adult>). To derive a correlate of myelin, we  
255 divided the T1w image intensity by the T2w image intensity and corrected for the bias field  
256 (Glasser & Van Essen, 2011; Glasser et al., 2014), which is referred to as T1w/T2w for the rest  
257 of the paper.

### 258 *2.3 HippUnfold - Hippocampal unfolding and surface-based segmentation*

259 The newly developed *HippUnfold* tool was used in the current study for surface-based  
260 segmentation and unfolding of the hippocampus (DeKraaker et al., 2022). *HippUnfold* is  
261 predicated on the idea that the hippocampal subfields are topologically constrained as they  
262 differentiate from a flat cortical mantle (Duvernoy et al., 2013). Using a ‘U-net’ deep  
263 convolutional neural network (Isensee et al., 2021), *HippUnfold* provides a detailed subject-  
264 specific tissue segmentation of the hippocampal gray matter and its topological boundaries (for

265 example, the Hippocampal Amygdala Transition Area and the Indusium Griseum as the most  
266 anterior and posterior topological boundaries, respectively) required for unfolding (DeKraaker et  
267 al., 2022). Segmentation is done for each individual hippocampi preserving its topologically  
268 consistent structure, which is critical for inter-individual alignment across variably shaped  
269 hippocampi. See Dekraaker et al. (2022) for more detailed information on *HippUnfold*.

270 The outputs of *HippUnfold* utilized in this study included the provided subfield  
271 segmentation, Laplacian coordinates for gradient field calculation (see section 2.5),  
272 macrostructure measures of curvature, gyrification, and thickness, and the midthickness surface  
273 representation for sampling volumetric space metrics onto the surface (see section 2.4). Due to  
274 the small size of the Dentate Gyrus (DG) and CA4, we combined them into a single DG/CA4  
275 subfield label. As well, portions of the DG were excluded in our surface representation. All  
276 subfield segmentations for both hemispheres were reviewed for gross errors by BK. The  
277 midthickness surface used in this study was composed of 2004 vertices with a spacing of roughly  
278 1mm. Averaging of each metric across subjects was performed at each vertex in unfolded space.

#### 279 *2.4 Characterization of microstructure with NODDI & DTI*

280 NODDI models the diffusion signal as a combination from 3 microstructural environments:  
281 intra-cellular, extra-cellular, and cerebrospinal fluid (CSF) (Zhang et al., 2012). The intra-  
282 cellular compartment is considered the space that is bounded by neurites, which is modelled as a  
283 set of sticks. The stick geometry captures the restricted diffusion of water perpendicular to  
284 neurites, and the relatively unhindered diffusion along them. Furthermore, sticks can capture the  
285 wide range of neurite orientations, from highly coherent to highly dispersed tissue. The extra-  
286 cellular compartment is the space around the neurites, which consists of glial cells and in gray  
287 matter, the somas. In extra-cellular space, the signal is modeled as Gaussian anisotropic diffusion  
288 to represent the hindered but not restricted movement of water. Finally, the CSF compartment is  
289 modelled as Gaussian isotropic diffusion, representing the free movement of water. NODDI does



290 not draw any *a priori* assumptions about whether a voxel is gray matter, white matter or CSF,  
291 and thus it treats each voxel as a possible combination of different compartments (Zhang et al.,  
292 2012). Thus, the normalized dMRI signal can be written as:

$$293 \quad E_{NODDI} = f_{iso}E_{iso}(d_{iso}) + W(\mu, \kappa)[f_{ec}E_{ec}(d_{perp}, d_{par}) + f_{ic}E_{ic}(d_{par})] \quad (1)$$

294 Where  $f_{iso}E_{iso}$ ,  $f_{ec}E_{ec}$  and  $f_{ic}E_{ic}$  are the volume and signal fractions of the CSF, extra-cellular,  
295 and intra-cellular (NDI) compartments, respectively. The extra-cellular and intra-cellular  
296 compartments are linked orientationally by the Watson distribution  $W(\mu, \kappa)$ , where  $\kappa$  is the  
297 concentration parameter ( $ODI = \frac{2}{\pi} \arctan(\frac{1}{\kappa})$ ) and  $\mu$  is the mean orientation of the Watson  
298 distribution (herein referred to as the NODDI microstructural vector or primary diffusion  
299 direction). The hindered perpendicular diffusion of the extra-cellular compartment  $d_{perp}$  is set via  
300 a tortuosity model. The original NODDI model which was developed mainly for white matter sets  
301 the parallel diffusivity value  $d_{par}$  equal to  $1.7 \times 10^{-3} \frac{mm^2}{s}$  and the isotropic or CSF compartment  
302 diffusion to  $3.0 \times 10^{-3} \frac{mm^2}{s}$ . Previous studies in the gray matter have sought to optimize  $d_{par}$ , and  
303 have consistently found that the lowest mean squared error is achieved with  $d_{par}$  equal to  
304  $1.1 \times 10^{-3} \frac{mm^2}{s}$  (Guerrero et al., 2019; Fukutomi et al., 2018). Thus, in the current study we  
305 used the gray matter optimized  $d_{par}$  value of  $1.1 \times 10^{-3} \frac{mm^2}{s}$  for fitting the NODDI model. The  
306 Microstructure Diffusion Toolbox (MDT; Harms et al., 2017) was utilized to fit the NODDI model  
307 using whole-brain diffusion images aligned to their respective T1w space with all b-values (b=0,  
308 1000, 2000, 3000 s/mm<sup>2</sup>). The validity of the assumptions of the NODDI model are discussed in  
309 section 4.6.

310 We also used the MDT (Harms et al., 2017) to calculate metrics of FA and MD using DTI.  
311 DTI was performed using only the  $b = 1000 \frac{s}{mm^2}$  volumes to align with typical DTI experiments

312 (Behrens & Johansen-Berg, 2014). Both the NODDI and DTI metrics were mapped onto the  
313 hippocampal midthickness surface using the process described below.

314 We used Connectome Workbench (<https://github.com/Washington->  
315 [University/workbench](https://github.com/Washington-University/workbench)) to sample values at each surface vertex from volume data. In this study  
316 we used 2004 vertices defined along the midthickness surface of the hippocampus. Sampling  
317 along the midthickness surface helps reduce partial volume effects. To sample voxel data along  
318 the midthickness surface we used a ribbon-constrained mapping algorithm which also requires  
319 the inner and outer surfaces also generated by *HippUnfold*. The ribbon method constructs a  
320 polyhedron from the vertex's neighbor on each surface defined, and then estimates the volume of  
321 the polyhedron that falls inside any nearby voxels to use as weights. We further reduced the  
322 weight of any voxel based on its distance from the midthickness surface, where the scaling value  
323 was calculated using a Gaussian with a standard deviation determined by the laminar thickness at  
324 each vertex. This had the effect of more aggressively down-weighting voxels further from the  
325 midthickness surface where the hippocampus is thinner. We then averaged each metric at each  
326 vertex across all subjects to generate the average maps which were plotted in folded and  
327 unfolded space.

### 328 *2.5 Examining the primary direction of diffusion relative to hippocampal axes*

329 Water molecules diffuse more readily parallel to microstructure, which in the hippocampus tends  
330 to be aligned along the AP, PD, and IO axes (Zeineh et al., 2017; Nieuwenhuys et al., 2008;  
331 Duvernoy et al., 2013). Thus, analyses were performed to examine how the primary direction of  
332 diffusion was oriented relative to these axes, with the goal of elucidating the stereotyped  
333 orientation of hippocampal microstructure (Figure 1). We obtained gradient vector fields along  
334 the AP, PD, and IO axes by taking the first derivative of the respective Laplacian coordinates  
335 provided by *HippUnfold* (Figure 1A), such that the vectors only pointed along one of the axes.

336 That is, we computed the partial derivative of the Laplacian coordinate function along the x, y,  
337 and z spatial dimension:

$$\begin{aligned} 338 \quad \vec{G}_{AP} &= \left[ \frac{\partial \psi_{AP}}{\partial x}, \frac{\partial \psi_{AP}}{\partial y}, \frac{\partial \psi_{AP}}{\partial z} \right] \\ 339 \quad \vec{G}_{PD} &= \left[ \frac{\partial \psi_{PD}}{\partial x}, \frac{\partial \psi_{PD}}{\partial y}, \frac{\partial \psi_{PD}}{\partial z} \right] \quad (2) \\ 340 \quad \vec{G}_{IO} &= \left[ \frac{\partial \psi_{IO}}{\partial x}, \frac{\partial \psi_{IO}}{\partial y}, \frac{\partial \psi_{IO}}{\partial z} \right] \end{aligned}$$

341 Where the function  $\psi_*$  represents the spatial Laplacian coordinates along a particular  
342 hippocampal axis (AP, PD, or IO), which were calculated by solving Laplace's equation along  
343 each axis ( $\nabla^2(\psi) = 0$ ) (DeKraker et al., 2022). The result was 3 distinct vector images within a  
344 hemisphere for each subject and axis. With the aligned NODDI microstructural vectors  
345 (representing the primary diffusion direction), we calculated cosine similarities between the  
346 generated vectors along the AP, PD, and IO axes and the NODDI microstructural vector at each  
347 voxel (Figure 1C & D). All vectors were normalized before calculating cosine similarities. The  
348 cosine similarity was defined as the inner product between vectors:

$$349 \quad \text{abs}\left(\frac{\bar{a} \cdot \bar{u}}{|\bar{a}| |\bar{u}|}\right) \quad (3)$$

350 Where  $\bar{a}$  was a hippocampal axis vector in a single voxel (AP, PD, or IO), and  $\bar{u}$  was the  
351 NODDI microstructural vector ( $\mu$  of the Watson distribution) at the same voxel. A higher cosine  
352 similarity meant that diffusion is increasingly oriented along that hippocampal axis (cosine  
353 similarities of 0 and 1 correspond to angles of 90 degrees and 0 degrees, respectively). The  
354 cosine similarities were then put into context of the known spatial arrangement of hippocampal  
355 microstructure and their stereotyped orientation (Figure 1A and B) under the assumption that the  
356 primary direction of diffusion modelled the main microstructural orientation at each voxel. There  
357 were a total of 3 cosine similarity images (one for AP, PD, and IO similarity values) within each

358 hemisphere for each subject. Each scalar cosine similarity image was sampled along the  
359 midthickness surface and averaged as described above.

### 360 *2.6 Correlations between all metrics*

361 Spearman correlations were performed at both the subject-level and at the level of the vertex  
362 averaged maps (Figure 2C-J average maps). However, it is difficult to test the significance of the  
363 spatial correspondence between maps. One proposed solution that has been implemented using  
364 the spherical representation of the cortical surface has been to perform spin testing, where the  
365 cortical sphere is randomly permuted to derive a null distribution of association which preserves  
366 the spatial autocorrelation in the data (Alexander-Bloch et al., 2018). Critically, the geometry of  
367 our unfolded hippocampus cannot be well represented by a sphere. We thus developed a similar  
368 method on the unfolded hippocampus. Our developed method uses periodic boundary conditions  
369 on the unfolded plane, which can be thought of as performing spin testing on a torus geometry.  
370 This allows us to perform rotations and translations and thus derive permuted null distributions.  
371 We then used this hippocampal spin test to analyze the significance of the observed associations  
372 between the averaged maps. We performed 2500 permutations between any two averaged maps,  
373 and we then performed false-discovery rate correction on the derived p-values using the  
374 Benjamini-Hochberg method. Technical and practical background on the developed  
375 hippocampal spin test can be found in Supplementary Document 1, and the spin test code can be  
376 found at Karat (2023).

### 377 *2.7 Orthogonal Projective NNMF (OPNNMF)*

378 Orthogonal Projective NNMF (OPNNMF) was used in this work to attempt to identify co-  
379 varying regions in the hippocampus using the metrics described above (Sotiras et al., 2015; Yang  
380 & Oja, 2010). OPNNMF decomposes an input matrix  $X$  of dimensions  $a \times b$  into a component  
381 matrix  $C$  ( $a \times k$ ) and a weight matrix  $W$  ( $k \times b$ ). The number of components ( $k$ ) is defined *a*  
382 *priori*. The component and weight matrices are derived such that their multiplication best

383 reconstructs the input data ( $X \sim C \times W$ ). OPNNMF solves the following minimization problem  
384 to estimate  $C$  (Sotiras et al., 2015):

$$385 \quad \|X - CC^T X\|^2 \text{ subject to } C \geq 0, C^T C = I, \text{ and } W = C^T X \quad (4)$$

386 Where  $\| \cdot \|^2$  represents the squared Frobenius norm and  $I$  denotes the identity matrix which  
387 enforces orthogonality among  $C$ .  $C$  is first initialized using a non-negative double singular value  
388 decomposition (Boutsidis & Gallopoulos, 2008). Then,  $C$  is updated through an iterative process  
389 until it converges on an optimal solution. The iterative multiplicative update rule is as reported by  
390 Yang and Oja (2010):

$$391 \quad \hat{C}_{ij} = C_{ij} \frac{(XX^T C)_{ij}}{(CC^T XX^T C)_{ij}} \quad (5)$$

392 Where  $i$  represents the number of vertices and  $j$  represents the number of components. The  
393 component matrix  $C$  represents the latent structure in the data and allows for an examination of  
394 the underlying covariance in multivariate data. As done in Patel et al. (2020) the sparse and non-  
395 overlapping component matrix allows for each vertex to be assigned an output component using a  
396 winner take all method which improves the interpretability of the spatial output components. The  
397 weight matrix  $W$  represents the subject-metric coefficients, allowing for an examination of subject-  
398 specific and metric-specific contributions to each component.

### 399 *2.8 Implementing OPNNMF*

400 A total of 11 metrics were included in the OPNNMF implementation (ODI, NDI, T1w/T2w, FA,  
401 MD, gyrification, thickness, curvature, AP cosine similarity, PD cosine similarity, IO cosine  
402 similarity) with subsets of these metrics used for more specific analyses (i.e. NODDI only, DTI  
403 only, macrostructure only, and cosine similarity only). The input matrix  $X$  was built using all  
404 2004 vertices of the midthickness surface in unfolded space for all 11 metrics across all 100  
405 subjects per hemisphere. That is, each subject contributed 11 unfolded space maps to the input  
406 matrix. Thus, the input matrix had 1100 columns (100 subjects x 11 metrics - defined as subject-

407 metrics) and 2004 rows (2004 vertices) for a single hemisphere. Normalization was required  
408 since the metrics exist on different scales. First, each metric was z-scored within each  
409 hemisphere. Then, each z-scored metric distribution was shifted by the minimum value from all  
410 the z-scored metrics to ensure all metrics were on the same scale and there were no negative  
411 values. All distributions were manually inspected to ensure the minimum value used was not an  
412 outlier.

413 OPNNMF was implemented using publicly available and open MATLAB code at  
414 <https://github.com/asotiras/brainparts> (Sotiras et al., 2015; Yang & Oja, 2010; Boutsidis &  
415 Gallopoulos, 2008; Halko et al., 2011). OPNNMF was run with a max number of iterations =  
416 10000, tolerance = 0.00001, and non-negative double singular value decomposition initialization.

#### 417 *2.9 Stability & Reconstruction Error*

418 The quantification of OPNNMF decomposition stability followed that of Patel et al. (2020).  
419 Stability was assessed by examining the similarity of the spatial component matrix C across  
420 varying splits of data. All 100 subjects were randomly split into two groups of equal sizes.  
421 OPNNMF was then performed on each split independently. A within-split similarity matrix was  
422 then derived by multiplying a particular splits component matrix by the transpose of itself (i.e. a  
423 cosine similarity). The result is a 2004x2004 (number of vertices x number of vertices) matrix  
424 where each row contains the cosine similarity of component scores between a vertex and all  
425 other vertices. Finally, a Pearson's correlation coefficient was calculated across the rows of the  
426 cosine similarity matrix between splits to quantify if the decomposition maintained the  
427 relationships between vertices. The above process was repeated 6 times, each with a new random  
428 split of the data. The mean and standard deviation of the correlation coefficient was taken across  
429 all vertices and splits for a given component solution. A correlation of 1 represented perfect  
430 stability (i.e. each split of the data had perfect correspondence between vertex relationships),  
431 whereas -1 represented instability. The above process was then repeated for different component

432 decompositions, from  $k=2$  to  $k=12$ . Reconstruction error was calculated through 3-steps. First,  
433 the component matrix  $C$  and the weight matrix  $W$  were estimated and then multiplied together to  
434 return the reconstructed input matrix. The original and reconstructed input matrix were then  
435 subtracted to obtain a reconstruction error matrix. The Frobenius norm of the reconstruction  
436 error matrix was then taken to get the reconstruction error. The gradient in the reconstruction  
437 error was taken across solutions with varying component numbers to assess the magnitude of the  
438 improvement in reconstruction error when adding more components.

### 439 *2.10 Interpreting OPNNMF*

440 The output component matrix  $C$  contains a component value for each vertex while the weight  
441 matrix  $W$  describes how each subject-metric is projected onto each component. A large value in  
442 the component matrix can be interpreted as a particular vertex being identified as a part of the  
443 variance pattern. The weight matrix can be used to elucidate which metrics contributed to each  
444 component as well as inter-subject variance within metrics. In the current study these 2 matrices  
445 were used to explore spatial patterns and the contributions of particular metrics to each  
446 component. A winner-take-all method was used where a vertex was assigned the integer of the  
447 component with the highest component weighting value from the matrix  $C$ . The matrix  $W$  was  $z$ -  
448 scored within each component row and then plotted to examine metric-specific trends.

## 449 **3. Results**

450 The results begin with qualitative descriptions of average macro- and microstructural measures  
451 and their correlations on the midthickness hippocampal surface (middle of the hippocampal gray  
452 matter). We also show the significance of these correlations using the developed hippocampal  
453 spin test. We then present results from a logistic regression model used to examine the  
454 separability of the subfields using microstructural features. We then show the cosine similarities  
455 between NODDI microstructural vectors and the hippocampal axis vectors. Finally, we present  
456 the OPNNMF results including a stability analysis and a 6-component solution.



### 457 *3.1 Distributions of Hippocampal Metrics*

458 Figure 2 presents Spearman's rho correlations, mean macro- and microstructural metrics, along  
459 with subfield segmentations shown on an averaged hippocampal midthickness surface in folded  
460 and unfolded space. The standard deviation of these metrics is shown in supplementary Figure 1.  
461 The orientation dispersion (ODI - Figure 2C) is highest in the anterior and body of CA1 and the  
462 distal parts of the subiculum, while dispersion is lowest in the body and posterior of DG/CA4,  
463 CA3 and CA2 and at the most proximal edge of the subiculum. Neurite density (NDI - Figure  
464 2D) is highest in the body and tail of the subiculum, while there is lower neurite density in CA1  
465 and the DG/CA4. The T1w/T2w ratio has a strikingly similar distribution to that of NDI, as  
466 found in previous cortical studies (Figure 2E; Fukutomi et al., 2018). T1w/T2w, ODI, and NDI  
467 maps appear to vary across the subfields.

468 Macrostructure features of thickness, gyrification, and curvature are shown in Figure 2H-  
469 J. Gyrification is largest in anterior CA1 and the DG/CA4. The thickest regions are the anterior  
470 and posterior of the subiculum and CA1, as well as throughout the DG/CA4, while CA3 and  
471 CA2 are thin. Curvature tends to be highest in the anterior part of the subiculum, along the spine  
472 of the hippocampus (red arrows in Figure 2J), and in CA3. These findings are largely in line with  
473 previous work (DeKraker et al., 2020).

474 Spearman's rho correlations between averaged maps of these metrics can be seen in the  
475 lower triangle of Figure 2A while the false-discovery rate (FDR) corrected p-values derived from  
476 the hippocampal spin test can be seen in the upper triangle. Similar correlations between all maps  
477 at the subject level can be seen in supplementary Figure 2. The null distributions given by the  
478 spin test using the averaged maps can be seen in supplementary Figure 3.

### 479 *3.2 Correlations between NODDI metrics & T1w/T2w*

480 In Figure 2D and E, strong qualitative similarities can be seen between NDI and T1w/T2w. Both  
481 are high in the subiculum and CA3/CA2 regions, while hypointensities are noted in CA1. A

482 significant spatial overlap is seen between the positively correlated NDI and T1w/T2w maps ( $\rho$   
483 = 0.86, FDR corrected p-value < 0.05). ODI (Figure 2C) and T1w/T2w (Figure 2D) are also  
484 significantly overlapping and are negatively correlated ( $\rho = -0.61$ , FDR corrected p-value <  
485 0.05). A similar correlation has also been noted across the entire cortex (Fukutomi et al., 2018).

### 486 *3.3 Correlations between NODDI & DTI metrics*

487 Qualitatively, the map of FA (Figure 2F) resembles the NDI map (Figure 2D) and the inverse of  
488 the ODI map (Figure 2C). Particularly, the distinct pattern of high dispersion equates to low FA,  
489 while high neurite density equates to high FA. Furthermore, the region of low neurite density  
490 (Figure 2D) in the body of CA1 and CA2 corresponds to a region of high MD (Figure 2G). ODI  
491 and FA have a significant spatial overlap and are negatively correlated ( $\rho = -0.88$ , FDR corrected  
492 p-value < 0.05). Furthermore, NDI and FA are significantly overlapping and are positively  
493 correlated ( $\rho = 0.75$ , FDR corrected p-value < 0.05) and NDI and MD are significantly  
494 overlapping and negatively correlated ( $\rho = -0.46$ , FDR corrected p-value < 0.05).

495 A disentangling of FA as determined by ODI and NDI has been reported previously in  
496 cortical gray matter (Zhang et al., 2012). Two voxels with different neurite densities can have the  
497 same FA if the one with the larger neurite density also has the larger dispersion (Zhang et al.,  
498 2012). That is, anisotropy as measured with FA conflates neurite density and orientation  
499 dispersion. We report a similar level of disentangling within the hippocampus in supplementary  
500 Figure 4, where within any bin of FA there is a range of potential ODI and NDI values.

### 501 *3.4 Correlations between macrostructure and NODDI metrics*

502 The only significant overlap between a macrostructural and microstructural map is gyrification  
503 and T1w/T2w, which are negatively correlated ( $\rho = -0.46$ , FDR corrected p-value < 0.05).  
504 Regions of high gyrification in CA1 spatially correspond to regions of low T1w/T2w content.  
505 While there are some other notable correlations, such as a moderate positive correlation between  
506 gyrification and ODI ( $\rho = 0.45$ ) and a moderate negative correlation between gyrification and

507 FA ( $\rho = -0.49$ ), none were significantly overlapping. Correlations between NODDI and

508 macrostructural measures at the subfield-averaged level can be seen in supplementary Figure 5.

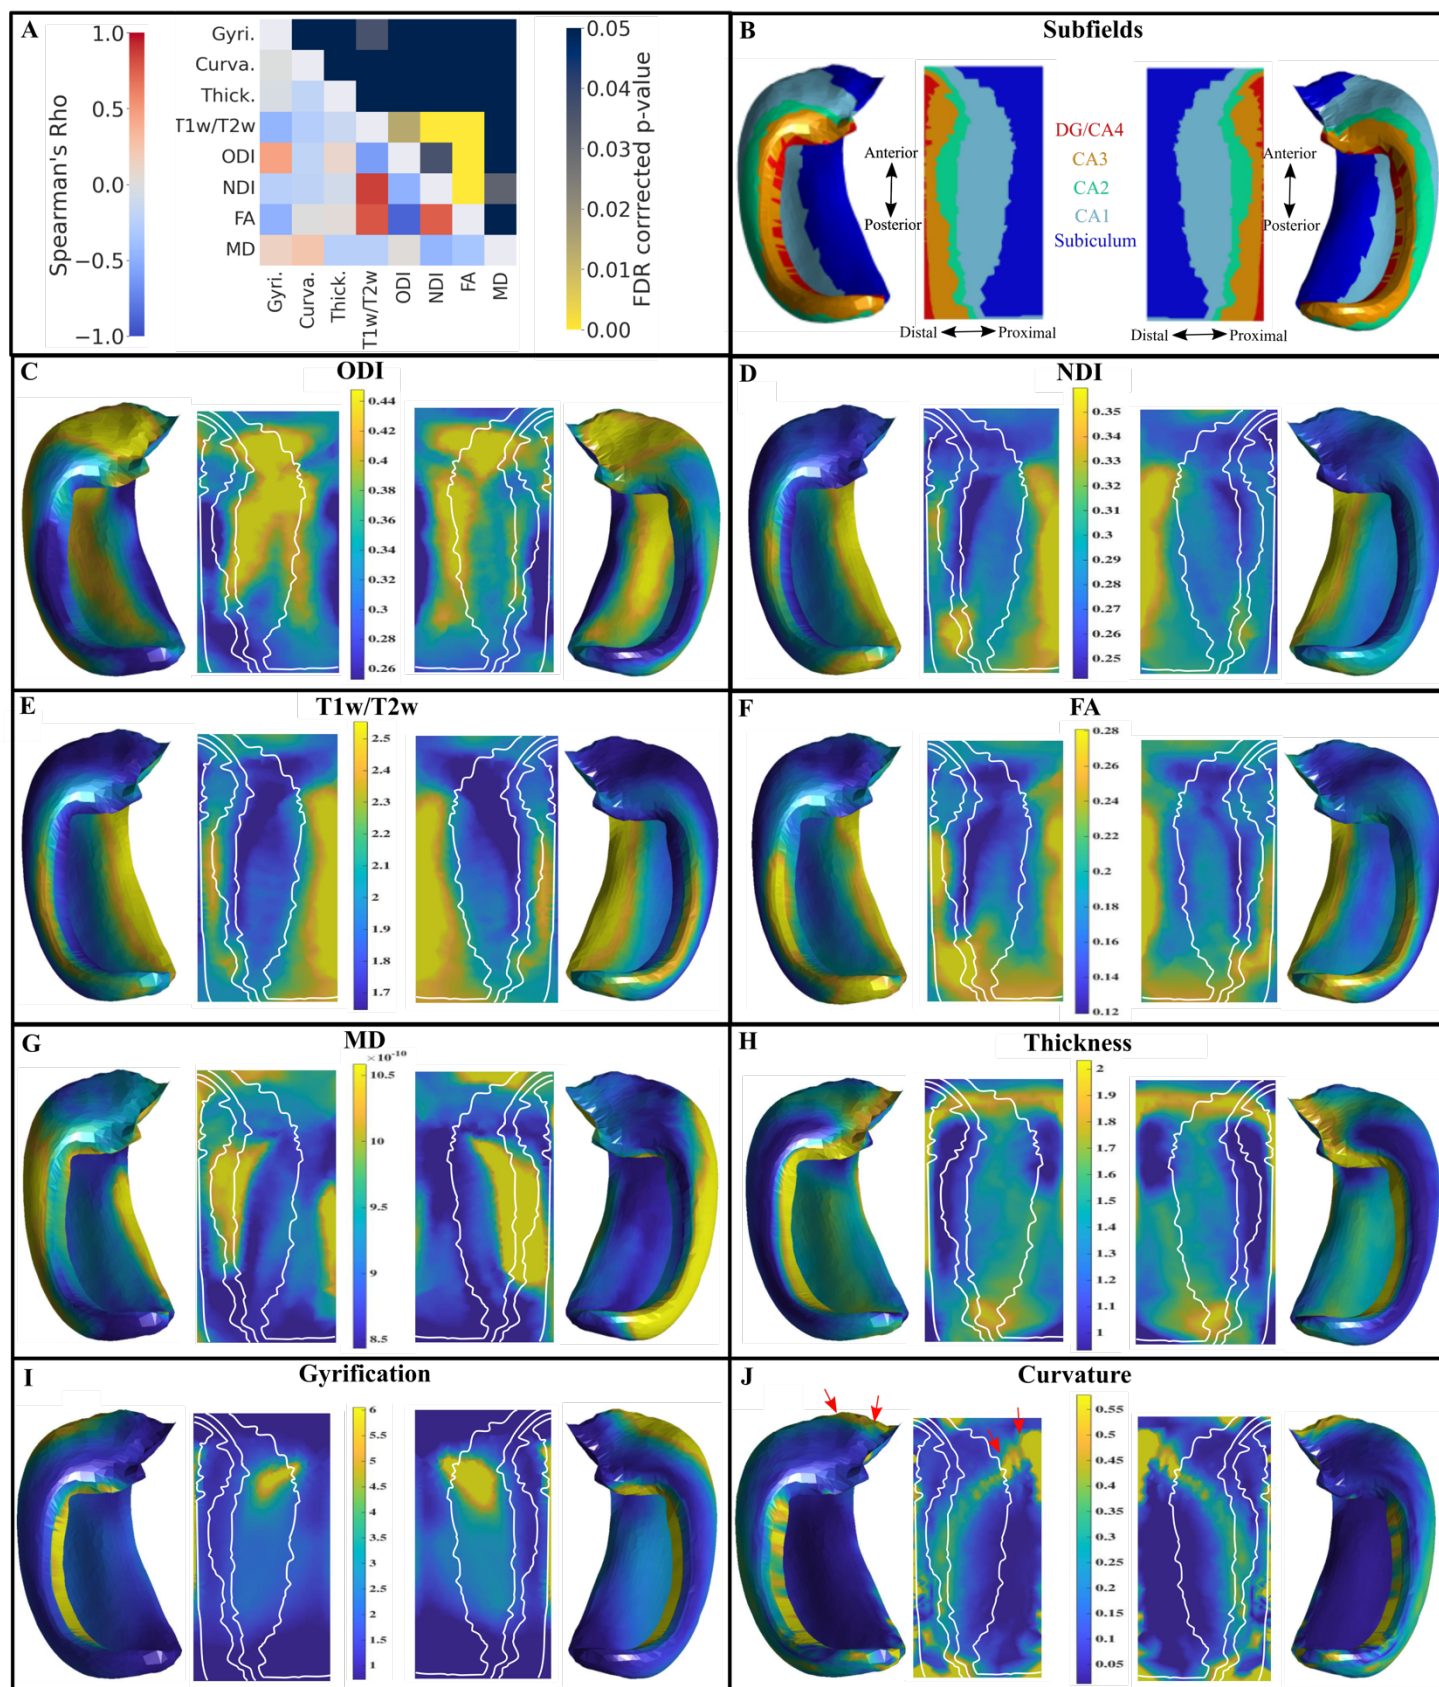

509 **Figure 2.** Correlations and plots of mean macro- and microstructure metrics on averaged  
510 hippocampal midthickness surfaces in folded and unfolded space for left and right hemispheres.  
511 (A) Lower triangle of the heatmap shows the Spearman's rho correlations of the average maps  
512 after combining both left and right hemispheres. The upper triangle represents the false-  
513 discovery rate corrected p-values derived from the hippocampus spin testing using 2500  
514 permutations. Note that the colour bar is inverted such that any brighter component of the  
515 heatmap corresponds to a significant p-value. (B) Left and right hippocampal subfields from a  
516 manual segmentation of a histological reference (Ammunts et al., 2013; DeKraker et al., 2020).  
517 Unfolded space is shown in the same orientation for left and right hemispheres. DG - Dentate  
518 Gyrus, CA - Cornu Ammonis. (C,D) Orientation Dispersion Index (ODI) and Neurite Density  
519 Index (NDI) from NODDI. White lines represent subfield borders shown in (B). (E) T1w/T2w  
520 ratio. (F,G) Diffusion Tensor Imaging metrics of Fractional Anisotropy (FA) and Mean  
521 Diffusivity (MD -  $m^2/s$ ). (H-J) Macrostructure measures of thickness, gyrification, and  
522 curvature. (J) Red arrows highlight the highly curved "spine" of the hippocampus.

### 523 *3.5 Evaluating the variability of the microstructural metrics across the subfields*

524 To examine if the microstructural metrics used here could provide differentiability to the  
525 subfields, we trained a simple logistic regression classifier with L2 regularization on subfield  
526 averaged microstructural measures using the scikit-learn (version 1.1.2) package in python  
527 (Pedregosa et al., 2011). 70 subjects were included in the training set, while 30 subjects were  
528 included in the testing set (both hemispheres were combined). ODI, NDI, and T1w/T2w  
529 averages across the midthickness surface within each of the 5 subfields per hemisphere were  
530 obtained within each subject in both the training and testing set. A logistic regression model was  
531 then trained to predict the subfield label given the subfield averaged microstructural metrics.  
532 This model was then tested on the unseen data from the testing set to quantify if the  
533 microstructural metrics are differentiable across the subfields. Examining all the data points for



534 ODI, NDI, and T1w/T2w, colour coded by subfield class, it appears that the subfields present as  
 535 relatively separable clusters apart from CA2 which appears to have lots of microstructural  
 536 overlap with the other subfields (Figure 3A). The same clustering can be seen in the test set  
 537 (Figure 3B) left out to evaluate the performance of the logistic regression classifier (Figure 3C).  
 538 Using a confusion matrix and F1-scores defined as  $(2 * \text{precision} * \text{recall}) / (\text{precision} + \text{recall})$ , it  
 539 can be seen that the simple logistic regression classifier was able to perform well in delineating  
 540 the subiculum (F1-score = 0.87), CA1 (F1-score = 0.85), CA3 (F1-score = 0.69), and the  
 541 DG/CA4 (F1-score = 0.83) using microstructural measures of ODI, NDI, and T1w/T2w (Figure  
 542 3D). However, CA2 was not as differentiable from the rest of the subfields using these metrics,  
 543 with an F1-score of 0.53. Furthermore, we found that ODI and NDI generally had higher F1-  
 544 scores and greater separability across the subfields than the DTI metrics of FA and MD  
 545 (supplementary Figure 6).

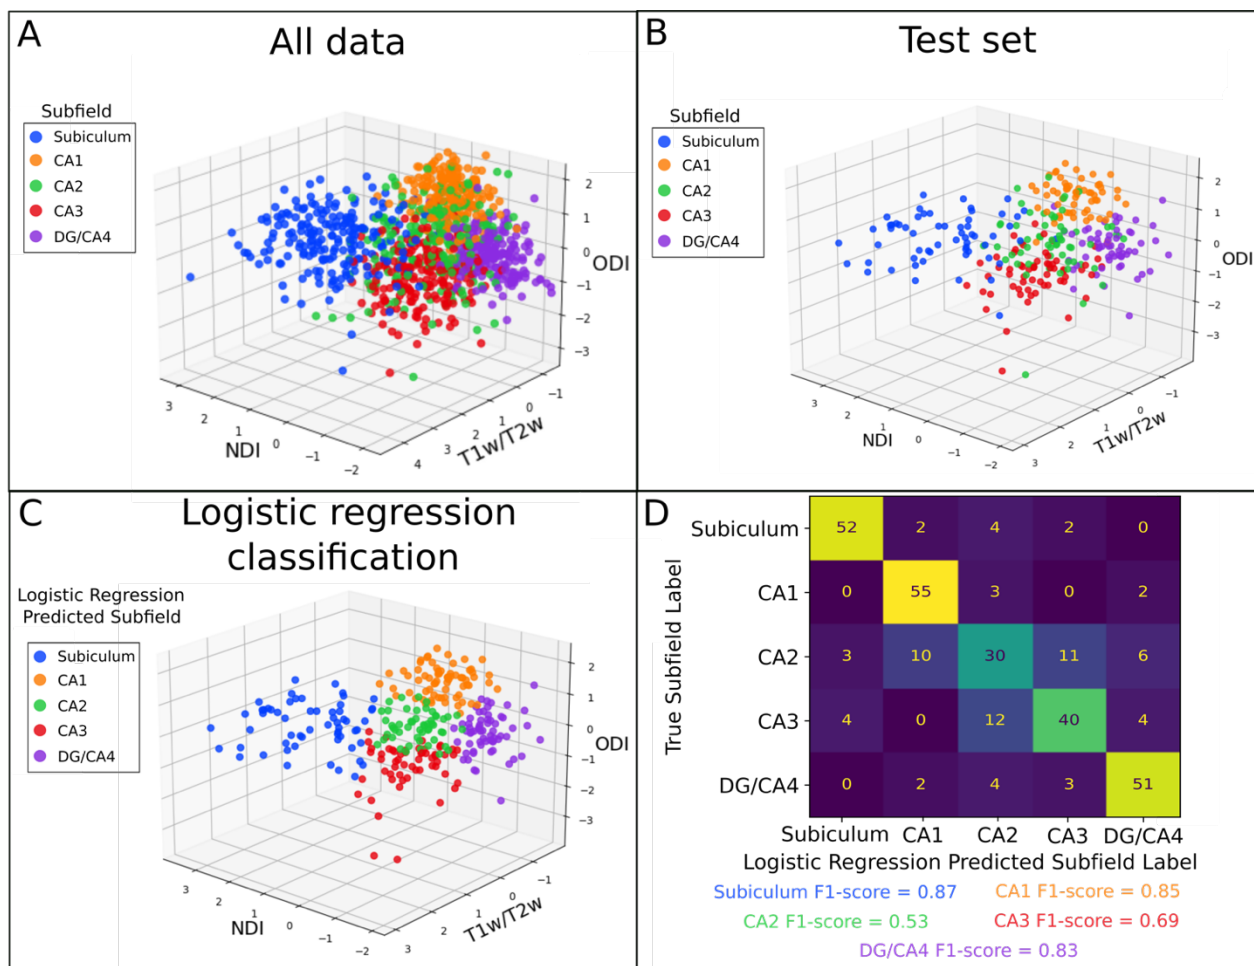

546 **Figure 3.** The performance of a logistic regression classifier to capture microstructural  
547 variability across the subfields. (A) Subfield averaged ODI, NDI, and T1w/T2w from all subjects  
548 and hemispheres combined coloured by subfield label. (B) Test set data from 30 subjects  
549 coloured by subfield. (C) Logistic regression classified labels on the test set seen in (B). (D)  
550 Confusion matrix and subfield-specific F1-scores to evaluate logistic regression performance on  
551 classifying the subfields using the microstructural measures of the test set.

### 552 *3.6 Examination of the primary direction of diffusion relative to hippocampal axes*

553 This section qualitatively analyzes the mean of the cosine similarities (Figure 1D; Figure 4)  
554 between the hippocampal vectors along the anterior-posterior (AP), proximal-distal (PD), and  
555 inner-outer (IO) (Figure 1A) axes and the NODDI microstructural vectors along the  
556 midthickness surface (Figure 1C).

557 High AP alignment can be seen in the body of the DG to CA3, as well as in the  
558 subiculum. Furthermore, there is relatively little AP oriented diffusion in CA1.

559 High PD oriented diffusion can be seen in the head of CA3, CA2, CA1, and in the body  
560 of CA1. There was little PD oriented diffusion in the body of DG/CA4, CA3, CA2, and the  
561 subiculum.

562 High IO alignment can be seen in the tail of the subiculum and CA1, as well as  
563 throughout the body of CA1, while low IO oriented diffusion can be seen in the body of the  
564 DG/CA4, CA3, CA2, and the subiculum.

565 The cosine similarities varied the greatest in CA1 and the subiculum across AP, PD, and  
566 IO directions (supplementary Figure 7). Noticeable differences in the orientation of diffusion  
567 across the subfields can be seen in supplementary Figure 8.

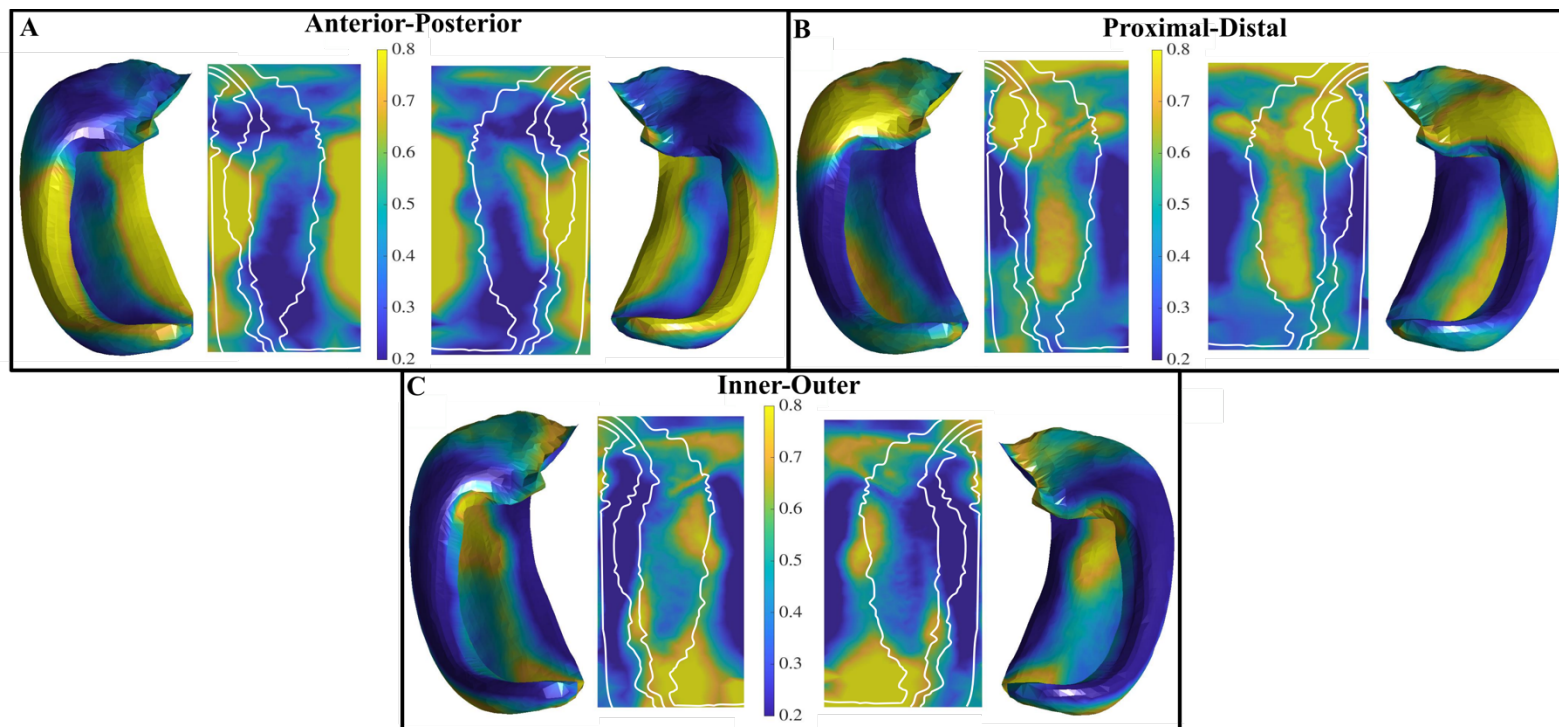

568 **Figure 4.** Mean of the cosine similarities between hippocampal axis vectors and NODDI  
569 microstructural vectors in the left and right hemisphere along the midthickness surface. High  
570 cosine similarities correspond to a high alignment of the NODDI microstructural vector along  
571 that particular hippocampal axis. (A) Distribution of cosine similarities along the anterior-  
572 posterior direction. (B) Distribution of cosine similarities along the proximal-distal (tangential)  
573 direction. (C) Distribution of cosine similarities along the inner-outer (laminar) direction.

### 574 3.7 Stability Analysis

575 The results of the stability analysis can be seen in Figure 5. Figure 5A presents the stability and  
576 the gradient in the reconstruction error using all the metrics combined that are shown in Figure  
577 5B-E. The goal of the stability analysis was to elucidate the largest component value that was  
578 still stable and provided a relative gain in reconstruction error. In Figure 5A it can be seen that a  
579 component solution of  $k=6$  has good stability with relatively low standard deviation.

580 Comparatively, decomposing into a larger number of components decreases the stability of the  
581 OPNNMF solution. As well,  $k=6$  does provide a relative gain in reconstruction error, although  
582 the largest gain in reconstruction error occurs when moving from a  $k=2$  to a  $k=3$  solution. The



583 stability analysis suggests that  $k=6$  is the highest component value that is largely stable, thus we  
 584 use this for the decomposition results using all metrics.

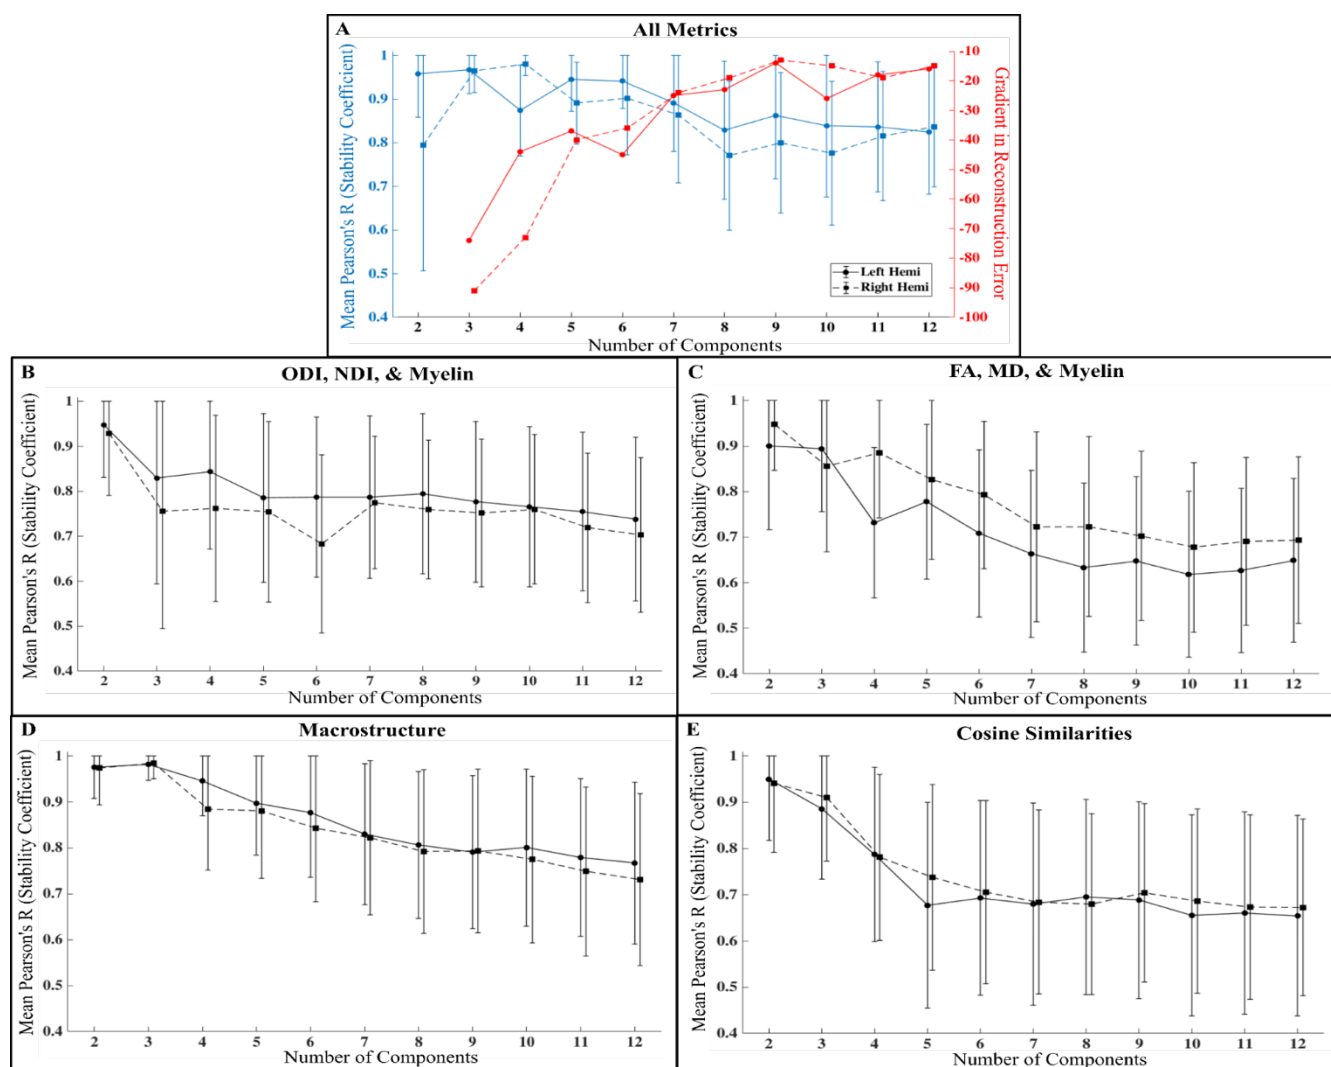

585 **Figure 5.** Stability coefficient and the gradient in reconstruction error based on the number of  
 586 components used for the OPNNMF solution. Filled in circles plus solid lines are the left  
 587 hemisphere and filled in squares plus dotted lines are the right hemisphere. Error lines show +/-  
 588 1 SD. (A) Stability coefficient (blue) and the gradient in reconstruction error (red) as a function  
 589 of the number of components using all metrics for NMF in B-E. (B) Stability coefficient for  
 590 NODDI metrics (ODI and NDI) plus T1w/T2w. (C) Stability coefficient for DTI metrics (FA  
 591 and MD) plus T1w/T2w. (D) Stability coefficient for macrostructure metrics (gyrification,  
 592 thickness, curvature). (E) Stability coefficient for cosine similarities (AP, PD, and IO). Points  
 593 between hemispheres are slightly offset along the x-axis so that error bars are visible.

594 Another goal of the stability analysis was to compare the stability of the decomposition  
595 using all metrics versus using smaller groupings of metrics, such as NODDI (ODI and NDI) plus  
596 T1w/T2w. Comparing Figure 5A with Figure 5B-E, it can be seen that for almost all component  
597 values the all metric solution tends to be more stable than any of the smaller metric groupings.  
598 This is especially true for the larger component values above  $k=6$ . These results suggest that the  
599 use of multiple metrics results in more stable parcellations, as found in Patel et al. (2020).

600 The 6-component solution using all metrics is presented in Figure 6 for both the left and  
601 right hippocampus. 4, 5, 6, and 7-component solutions using all the metrics can be found in  
602 supplementary Figure 9. 4-component solutions for all smaller metric combinations shown in  
603 Figure 5B-E can be found in supplementary Figure 10.

### 604 *3.8 Description of the 6-component Solution*

605 Figure 6A depicts the winner-take-all method applied at each vertex in folded and unfolded  
606 space for 6-components. Figure 6B shows the z-scored subject-metric weight matrices. In the  
607 following paragraph we describe the first 3 components including their location relative to the  
608 subfields (proximal-distal/medial-lateral axes) as well as along the anterior-posterior  
609 (longitudinal) axis. We then briefly describe components 4-6. We also describe the features  
610 which contribute to each component. The left and right hippocampus do have similar covariance  
611 patterns although the component ordering differs. For example, the vertices of left component 1  
612 correspond to the vertices of right component 2. To simplify our descriptions, we take the  
613 ordering of the left hippocampus for the rest of the paper, and we have made this adjustment  
614 such that the difference in ordering does not need to be considered for Figure 6 (Patel et al.,  
615 2020).

616 Component 1 is characterized by a cluster of vertices through the body and tail of the  
617 most proximal edge of the subiculum and through the body and tail of CA3. This component  
618 spans around the bottom two-thirds of the hippocampus across its anterior-posterior axis.

619 Component 1 is characterized by high NDI, T1w/T2w, FA, and AP cosine similarity, with lower  
620 ODI, PD and IO cosine similarity. This may reflect the large anisotropic AP oriented fiber  
621 bundles that are myelinated such as the cingulum bundle for the proximal edge of the subiculum  
622 and the fimbria for CA3.

623 Component 2 is characterized by vertices that are present only in the body or middle one-  
624 third along the anterior-posterior axis of CA1. This component is characterized by high ODI,  
625 gyrification, and PD and IO cosine similarities. This likely reflects a high heterogeneity in fiber  
626 orientation in CA1.

627 Component 3 is characterized by vertices that cross the subiculum and CA1 in a  
628 proximal-distal fashion in the head of the hippocampus, as well as vertices that span the anterior-  
629 posterior body of the hippocampus at the border between the subiculum and CA1. This  
630 component is characterized by high ODI, thickness, and IO cosine similarity.

631 Component 4 corresponds to a large posterior cluster that stretches into the body of CA1  
632 characterized by a moderate range of metrics with the largest being the PD cosine similarity and  
633 FA. Component 5 corresponds to a cluster of vertices in the body of CA2 and CA1 and is  
634 represented by a large MD, curvature, and AP cosine similarity and low NDI, T1w/T2w, FA, and  
635 thickness. Interestingly, component 6 is characterized by a thin cluster of vertices roughly  
636 corresponding to the anterior and body of the DG/CA4 region. This was represented by high  
637 macrostructural measures of thickness, gyrification, and curvature and low weights for all other  
638 metrics.

639 A general pattern is noticed when examining the whole 6-components rather than looking  
640 at its parts. Generally, more parcellations exist along the proximal-distal direction than do in the  
641 anterior-posterior direction.

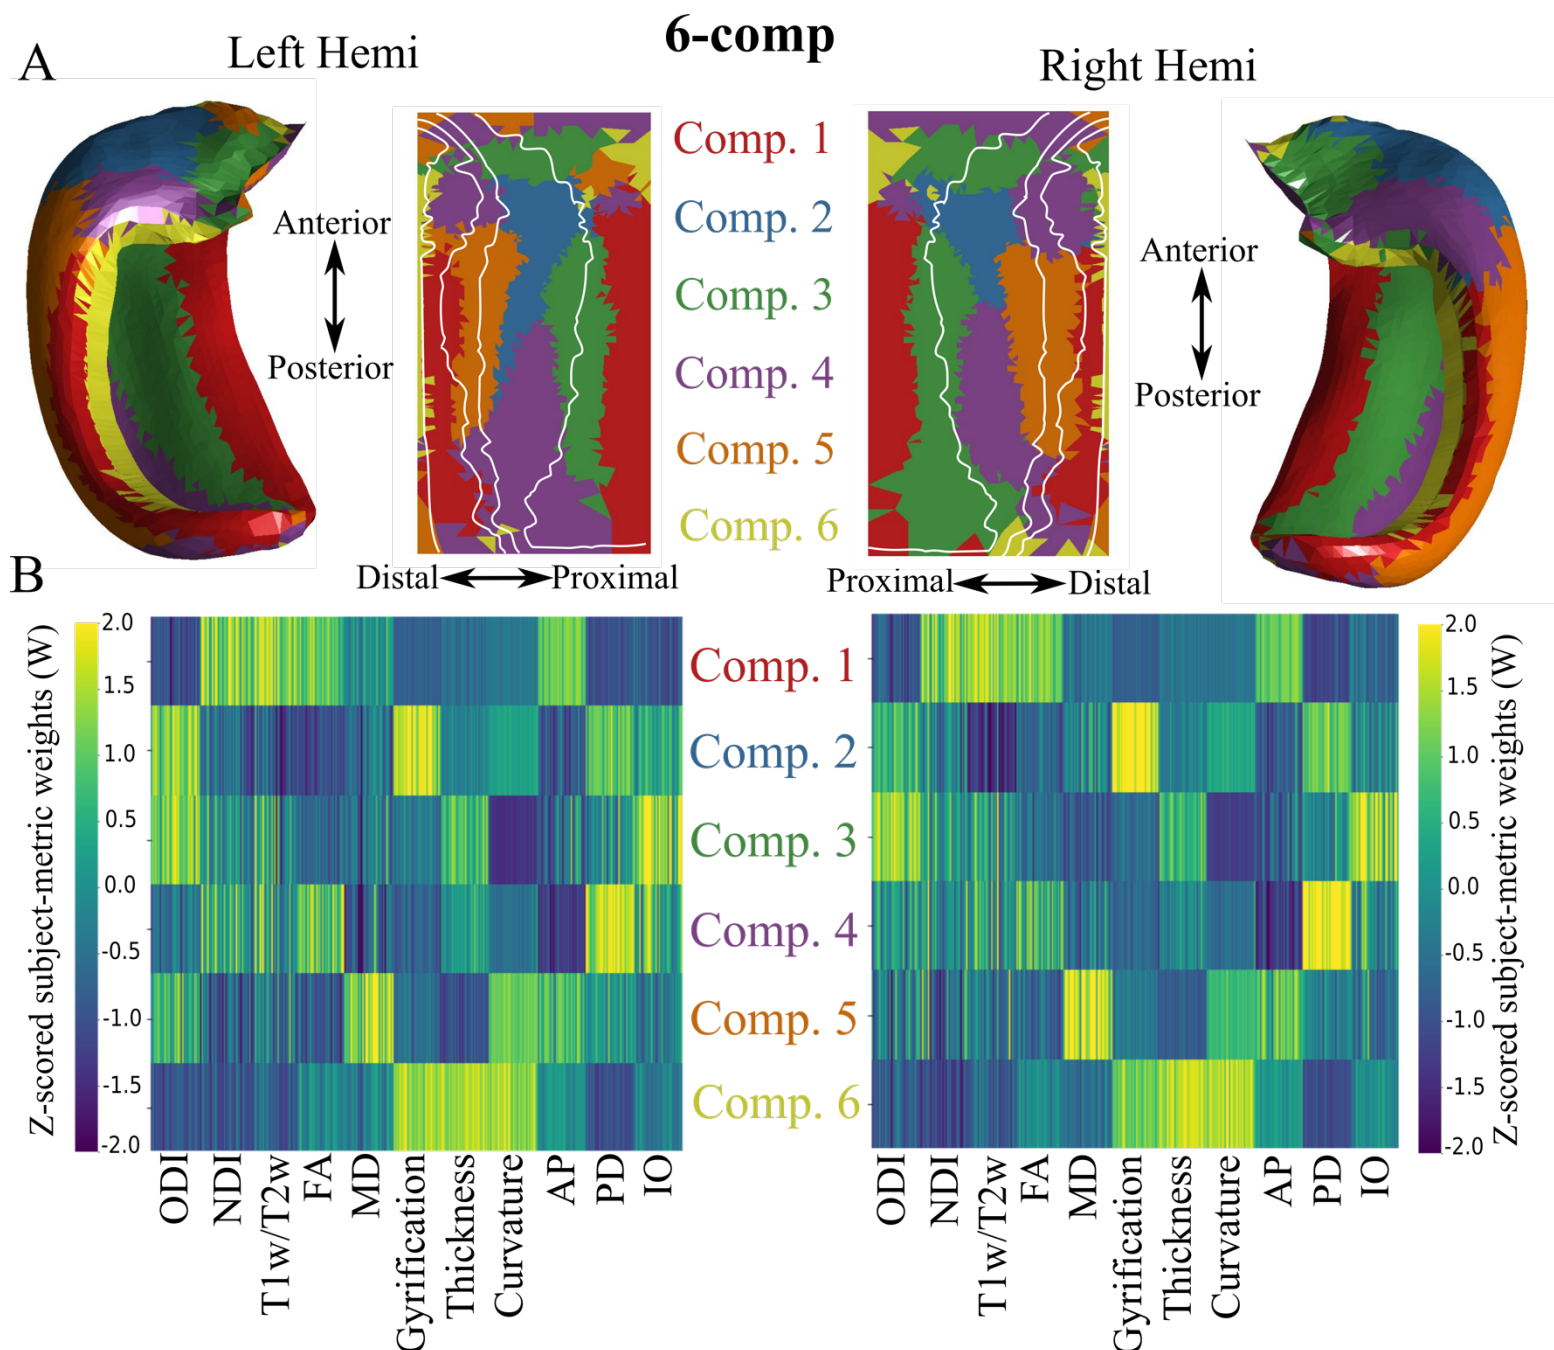

642 **Figure 6.** 6-component NMF solution on the midthickness surface for left and right hippocampi. (A)  
 643 Winner-take all output at each vertex shown in folded and unfolded space. White lines denote subfield  
 644 borders. (B) Z-scored subject-metric weight matrices across each of the 6 components, denoting the z-  
 645 scored contribution of each metric to each component. AP, PD, and IO represent the 3 cosine similarity  
 646 metrics.

647 **4. Discussion**

648 In the current study we examined the microstructure of the hippocampus using the in vivo HCP  
649 dMRI and structural data, along with a novel surface-based method for subfield segmentation. We  
650 found that ODI was highest in the CA1 subfield, likely capturing the large heterogeneity of  
651 tangential and radial fibers. NDI and T1w/T2w were found to be strongly correlated and were  
652 highest in the subiculum and lowest in CA1 and the DG/CA4, suggesting that NODDI is likely  
653 sensitive to the myelin content of the hippocampus. Using these microstructural measures, we  
654 found that the cytoarchitectonic defined subfields were largely separable using a simple logistic  
655 regression model. OPNNMF components appeared to capture unique co-varying clusters within  
656 the hippocampus, with high medial-lateral variability. Finally, we showed distinct regions of  
657 similar microstructural orientations by examining the main direction of diffusion relative to the  
658 three hippocampal axes, which may correspond to specific microstructural properties.

659 *4.1 Dispersion of neurites in the hippocampus may reflect heterogeneous radial and tangential*  
660 *neurite components*

661 The Orientation Dispersion Index (ODI) is meant to characterize the variation in diffusion  
662 orientations around a single dominant direction at every voxel. A previous study using ODI and  
663 patch-wise circular variance measured using histology (measures variability in neurite  
664 orientations) has shown that both measures have lower dispersion in demyelinated lesions in  
665 patients with multiple sclerosis, where there is reduced geometrical complexity of neurites  
666 (Grussu et al., 2017). The hippocampal gray matter has a general distribution of microstructure  
667 that is similar to the neocortex, with tangential (proximal-distal) and radial (inner-outer)  
668 components that follow the curvature of the hippocampus. In the current study we showed that  
669 CA1 had the largest ODI, suggesting that it had the largest heterogeneity in neurite orientations.  
670 CA1 has large tangential neural processes, like the Schaffer collaterals and perforant path, as  
671 well as a large (yet dispersed) radial pyramidal cell layer (Duvernoy et al., 2013). By measuring

672 the orientation of the main direction of diffusion relative to the three hippocampal axes in CA1  
673 (Figure 4), we found either high tangential or radial diffusion, supporting the idea that ODI  
674 reflected the heterogeneity of these components. Conversely, ODI was lower in DG/CA4, CA3,  
675 and at the most proximal edge of the subiculum. In these regions the primary diffusion direction  
676 was minimally tangential or radial, and was mainly anterior-posterior or oblique with large  
677 macroscopic diffusion anisotropy (i.e. large NDI and FA). The apparent reduction in  
678 orientational heterogeneity (less radial/tangential components) and a resulting increase in  
679 anisotropy may potentially explain the low ODI in these regions. In the DG/CA4 and CA3  
680 region this could be a result of partial voluming with the nearby fimbria, and in the subiculum it  
681 could be due to partial voluming with the nearby cingulum bundle or the perforant path at its  
682 most proximal edge (supplementary Figure 11). As hypothesized in the rest of the cortex  
683 (Fukutomi et al., 2018), it is likely that ODI in the hippocampal gray matter is largely driven by  
684 the heterogeneity of radial and tangential neurite components.

#### 685 *4.2 Hippocampal neurite density is highly correlated with T1w/T2w*

686 The distribution of the NDI and T1w/T2w across hippocampal gray matter was similar, as seen  
687 in Figure 2D and E and as shown by their strong positive correlation and significant overlap.  
688 While the diffusion signal is generally agnostic to water within myelin, previous work has shown  
689 that myelinated axons restrict diffusion to a greater degree than unmyelinated axons (Behrens &  
690 Johansen-Berg, 2014). This increase in restriction due to myelin would result in an increase in  
691 NDI since there is more “stick” like diffusion occurring (i.e., a monoexponentially decaying  
692 signal with a slope defined by the parallel diffusivity). Furthermore, due to the short exchange  
693 time of water within dendrites and glia to the extra-cellular space, it is likely that any restricted  
694 diffusion would be reflective of myelinated axons (Jespersen et al., 2010). This suggests that  
695 NDI reflected the myelin content of the hippocampus. The T1w/T2w content and NDI were  
696 largest in the body and tail of the subiculum. High myelin content in the subiculum has been

697 noted previously with histology (Ding & Van Hoesen, 2015). Furthermore, it is likely that the  
698 white matter of the cingulum bundle or perforant path contribute to the large T1w/T2w content  
699 seen in the subiculum. Conversely, T1w/T2w and NDI were lower in CA1, which is likely a  
700 result of a relatively sparse layer of pyramidal cells along the midthickness surface or the largely  
701 unmyelinated Schaffer collaterals (Jürgen et al., 2011; Szirmai et al., 2012). Overall, the  
702 distribution of T1w/T2w found here agreed with previous studies (DeKraker et al., 2018;  
703 *Ábrahám et al., 2012*). A strong positive correlation between NDI and T1w/T2w was found  
704 previously across the cortex. However, the hippocampus was found to have high values in NDI  
705 but low values of T1w/T2w when compared to the rest of the cortical areas (Fukutomi et al.,  
706 2018). Here we showed that a strong correlation between NDI and T1w/T2w still exists in the  
707 hippocampus when comparing them at a finer spatial scale. This correlation is further  
708 corroborated by another cortical study at high ex vivo resolutions in the rodent brain, in which  
709 cortical NDI was strongly correlated with staining intensity of myelinated axons (Jespersen et al.,  
710 2010). Histological work has found similar correlations in white matter, where myelin content  
711 was found to be strongly correlated with axon count (Schmierer et al., 2007). However, a recent  
712 study utilizing a multicomponent relaxometry method for imaging myelin water fraction found  
713 no significant correlation between myelin and NDI measured using NODDI in most white matter  
714 structures (Qian et al., 2020). While NDI and T1w/T2w as a proxy of myelin do appear to be  
715 correlated in gray matter including the hippocampus, further work is needed to examine this  
716 correlation in other white matter structures, including white matter surrounding the hippocampus  
717 such as the fimbria, fornix, and alveus.

#### 718 *4.3 Microstructure metrics systematically vary across the subfields*

719 Microstructural metrics such as intra-cortical myelin and macrostructural cortical thickness have  
720 been shown to be useful in parcellating the neocortex into subregions (Nieuwenhuys, 2013;  
721 Glasser et al., 2014; Glasser & Van Essen, 2011). Furthermore, using non-negative matrix



722 factorization of T1w/T2w, MD, and FA it was found that a 4-component solution qualitatively  
723 resembled hippocampal subfield borders (Patel et al., 2020), suggesting that T1w/T2w and  
724 microstructure may provide sufficient separability to parcellate hippocampal subfields. In the  
725 current study, by examining their averaged maps, we found that T1w/T2w, NDI, and ODI  
726 appeared to be separable qualitatively across the subfields (Figure 2). Quantitatively, we showed  
727 that a simple logistic regression model performed well in predicting the subfield label based on  
728 the subfield-averaged metrics of T1w/T2w, NDI, and ODI. This result suggests that these  
729 microstructural measures are potentially sensitive to the known microstructural differences  
730 across the subfields as defined via cytoarchitectonics. Critically, it appeared that NDI and ODI  
731 provided more separability across the subfields than FA and MD, suggesting that NODDI may  
732 be more useful than DTI in capturing known microstructural differences across subfields  
733 (supplementary Figure 6). CA2 appeared to be the exception, with a distinct pattern of MD when  
734 compared to the other subfields, while this separability of CA2 was not captured with NODDI  
735 metrics (supplementary Figure 6). Myelin content has been demonstrated previously to closely  
736 correspond to averaged subfield borders (DeKraker et al., 2018). To a lesser extent,  
737 macrostructure appeared to also follow the subfield borders, which has been noted previously for  
738 thickness (DeKraker et al., 2018). While thickness is consistently low in CA3 and CA2, and  
739 gyriification is consistently high in CA1, these measures alone may not differentiate all subfield  
740 boundaries. Thus, a combination of NODDI and macrostructural measures may provide  
741 complimentary information needed for subject-specific subfield delineation.

#### 742 *4.4 The orientation of diffusion relative to the hippocampus may be useful in identifying* 743 *hippocampal microstructure*

744 We quantified the main direction of diffusion relative to the 3 main hippocampal axes which  
745 microstructure tends to align closely with. Here we provide descriptions of microstructure  
746 (Figure 1B) that likely contribute to the orientation results. The following three paragraphs

747 describe the anterior-posterior (AP), proximal-distal (PD), and inner-outer (IO) alignment,  
748 respectively.

749         The high AP alignment in the body of the DG to CA3 was likely driven by the  
750 neighbouring fimbria, the largest bundle in that region oriented AP. High AP alignment in the  
751 subiculum was likely caused by the cingulum, a large fiber bundle that traverses the  
752 parahippocampal gyrus. Some partial voluming from the outer (where the cingulum exists) to the  
753 midthickness surface was expected, which may drive this alignment.

754         High PD alignment in the head of CA3 was expected to be either Schaffer collaterals  
755 which curve immediately PD off of the apical dendrites of the pyramidal cells or from perforant  
756 projections coming from the entorhinal cortex and entering CA3 which are also oriented PD.  
757 High PD alignment in CA1 was likely a result of the Schaffer collaterals. The Schaffer  
758 collaterals make synaptic contact at the apical and basal dendrites of CA1 in a PD fashion  
759 (Nieuwenhuys et al., 2008; Swanson et al., 1978). However, the perforant path could have also  
760 contributed to a higher PD alignment as it moves from the entorhinal cortex to the DG synapsing  
761 on CA1 along the way (Nieuwenhuys et al., 2008). Furthermore, a high PD cosine similarity in  
762 the CA3 region could have been a result of partial voluming with the alveus, a highly PD  
763 oriented bundle that sits atop the hippocampal gray matter.

764         High IO alignment seen in CA1 was likely a result of the pyramidal neurons. The  
765 pyramidal somas exist in the stratum pyramidale layer of the midthickness surface, and are  
766 generally scattered in CA1 (Nieuwenhuys et al., 2008). Their axons and basal dendrites move IO  
767 towards the alveus/outer surface and their large apical dendrites move IO towards the stratum  
768 radiatum/inner surface. All IO alignment seen in CA1 was expected to be caused by the  
769 pyramidal neurons or other afferent CA1 paths such as the Schaffer collaterals which may curve  
770 IO before making contact with the apical dendrites of the pyramidal neurons. High IO alignment  
771 in the subiculum was also likely caused by pyramidal neurons as in CA1.

772 The cosine similarities across subjects varied the greatest in CA1 and the subiculum across AP,  
773 PD, and IO directions (supplementary Figure 7).

774 Typical hippocampal microstructural analyses average scalar diffusion metrics (such as  
775 FA, MD, NDI, etc.) either across whole hippocampi (van Uden et al., 2015; Salmenpera et al.,  
776 2006) or whole subfields (Radhakrishnan et al., 2020), which are inherently non-specific towards  
777 microstructure that exists within and across subfields and the hippocampal long-axis. However,  
778 tractography analyses which aim to capture the continuous intra-hippocampal circuitry are  
779 difficult to perform, as at lower resolutions, tracts can be spurious requiring complex acquisition  
780 and correction schemes (Zeineh et al., 2012). The orientational analyses described here have the  
781 potential to increase specificity at in vivo resolutions by leveraging the known anatomical  
782 orientations of hippocampal microstructure. Furthermore, capturing the essence of hippocampal  
783 microstructural orientations with vertex-wise scalar values can make qualitative observations and  
784 statistical analyses more tenable than with the complex 3D orientations provided by  
785 tractography. Future studies could relate the hippocampal axis vectors to other dedicated  
786 methods of diffusion orientation representation that have the ability to faithfully represent more  
787 complex fiber configurations.

788 Applications of the proposed orientational methods may be useful to identify  
789 microstructure deterioration in disease states, where affected microstructure may be less  
790 prominent, and may appear as smaller cosine similarities along a particular axis. For example,  
791 perforant path lesions in rats caused rapid memory loss which was akin to early-stage  
792 Alzheimer's disease (Kirkby & Higgins, 2001). A 2010 study found deterioration of the  
793 perforant path in aged humans using diffusion tensor imaging (Yassa et al., 2010). Perforant path  
794 degradation should result in less attenuation of the diffusion signal along its length, which may  
795 potentially show up as smaller PD cosine similarities specifically in the subiculum, CA3, and  
796 CA1, as there should be less PD oriented diffusion. This may be possible for other neurological

797 diseases where specific microstructure is affected, such as pyramidal neuron degradation which  
798 should result in smaller IO cosine similarities. However, to draw such conclusions, further ex  
799 vivo validation with the ability to measure more ground-truth microstructural orientations will be  
800 essential to evaluate the usefulness of this method. As well, future studies will have to evaluate  
801 the efficacy of this method at clinical resolutions.

#### 802 *4.5 6-component OPNNMF solution displays distinct co-varying regions of macro- and* 803 *microstructure*

804 The hippocampus is believed to have two main interacting dimensions of organization along its  
805 medial-lateral/proximal-distal or subfield axis, and across its long or anterior-posterior axis (see  
806 Genon et al., 2021 for review). In the current study with a 6-component OPNNMF solution we  
807 found a gradient in the clusters along the proximal-distal direction, suggesting that regions along  
808 this axis had disparate macro- and microstructural properties. That is, the macro- and  
809 microstructural “axes” of the hippocampus as defined by the metrics used here tended to vary  
810 along the same axis that the subfields were defined. Variability along this axis was expected, as  
811 the subfields show differences in morphology, cytoarchitectonic profiles (Duvernoy et al., 2013;  
812 Ding & Van Hoesen, 2015), and connectivity (Andersen et al., 1971), which likely manifest as  
813 changes in macro- and microstructure. However, it is notable that a wide array of disparate  
814 metrics at in vivo resolutions show such patterns. Recently there has been interest in the long-  
815 axis organization of the hippocampus, with evidence coming from anatomical and physiological  
816 recordings in rodents (Chase et al., 2015). In the current study there appeared to be a smaller  
817 gradient in the clusters along the anterior-posterior axis, suggesting that the metrics used here  
818 varied less along the long-axis when compared to the proximal-distal axis. While functional  
819 studies have found stark variability across the long axis, it is unclear to the extent which the  
820 hippocampal microstructure varies across this axis (Genon et al., 2021, Plachti et al., 2019).

821 Future work could look to examine the variability of dMRI measures across the long axis at  
822 higher resolutions.

#### 823 *4.6 Limitations*

824 There are some limitations of the current research that largely pertain to the metrics used here.  
825 As noted in the introduction, DTI aims to capture the macroscopic diffusion anisotropy at each  
826 voxel, assuming that the diffusion process can be well characterized by a Gaussian distribution.  
827 Due to its popularity in both clinical and research settings, we sought to examine the distribution  
828 of two common DTI measures (FA and MD) in the hippocampus. However, in most gray matter  
829 regions there tends to be a complex arrangement of fiber orientations that cannot be well  
830 modelled via a single tensor. This can result in drastically understated FA values with generally  
831 spherical or planar DTI ellipsoids which contain minimal information on diffusion orientations  
832 (Campbell et al., 2005). While DTI has been used extensively in the hippocampus, it has  
833 generally been purported to be sensitive but not specific to its microstructure (Coras et al., 2014).  
834 In ex vivo tissue at microscopic resolutions DTI metrics of FA and MD have shown good  
835 contrast to the hippocampal laminae, demonstrating their sensitivity (Coras et al., 2014;  
836 Shepherd et al., 2007; Stolp et al., 2018). However, at lower in vivo resolutions used here a  
837 plethora of microstructure partial voluming within each voxel is inevitable, which leads to a  
838 diffusion signal that may show little macroscopic diffusion anisotropy and thus cannot be  
839 captured by a single tensor. Indeed, here we found that even the largest FA values of the  
840 hippocampus in regions of purportedly high T1w/T2w tended to range around 0.28, a relatively  
841 low amount of macroscopic anisotropy. Furthermore, it is unclear the extent to which extra-  
842 hippocampal white matter such as the fimbria and angular bundle might influence our measures  
843 sampled along the middle of the hippocampal gray matter.

844 The NODDI model has also been used extensively in both healthy and diseased states to  
845 provide metrics that are biologically grounded. Such work involved explicitly modelling the

846 diffusion signal as a sum of compartments representing varying tissue geometries (Zhang et al.,  
847 2012). However, some assumptions of the NODDI model are likely not valid in practice. The  
848 tortuosity assumption that links the extra-cellular perpendicular diffusivity to the axon volume  
849 fraction does not hold for tight axon packings (Jelescu et al., 2016). The NODDI model also sets  
850 the intra-axonal parallel diffusivity equal to the extra-axonal parallel diffusivity. However, the  
851 intra-axonal parallel diffusivity has been shown to be much higher than the extra-axonal parallel  
852 diffusivity (Jelescu et al., 2016; Novikov et al., 2018). While we altered the fixed NODDI  
853 diffusivity values to reflect what has been found in gray matter, the modelling degeneracies  
854 mentioned here could influence the NODDI metrics, such that they may not correspond to the  
855 biophysical reality of the tissue. To this end, there has been recent work which has sought to re-  
856 structure the basic microstructural building blocks used for white matter modelling to improve  
857 characterization of the gray matter. Two primary examples of this include a model which  
858 accounts specifically for the presence of the soma (Palombo et al., 2020) and a model which  
859 considers the water exchange across the cell membranes (i.e., from neurites to extra-cellular  
860 space) (Jelescu et al., 2022). Future work should look to apply gray matter specific models in the  
861 hippocampus.

862 Finally, the T1w/T2w ratio as a proxy for myelin content was used in the current study  
863 based on previous work that demonstrated good correspondence with cortical patterns of myelin  
864 distribution (Glasser & Van Essen 2011). However, recently it has been suggested that the  
865 T1w/T2w ratio is a suboptimal proxy of myelin in the subcortex (Arshad et al., 2017). At  
866 present, it is unclear whether the T1w/T2w ratio is also a suboptimal marker of myelin for  
867 archicortical areas such as the hippocampus. Future work should look to investigate the use of  
868 other techniques derived from quantitative MRI including magnetization transfer and myelin  
869 water imaging to get an improved measure of myelin content within the hippocampus (Tardif et  
870 al., 2016).



## 871 **5. Conclusion**

872 In the current study we show distinct in vivo microstructural distributions and orientations within  
873 and across the hippocampal subfields, something that has not been investigated with comparable  
874 granularity up to this point. Furthermore, we provide context for the use of surface-based  
875 approaches to investigate hippocampal microstructure.

876 Our findings have several important implications for future work. The hippocampus is  
877 particularly vulnerable to certain neurological diseases such as Alzheimer 's disease and  
878 epilepsy, in which it is often one of the earliest aberrant structures (Dhikav et al., 2012).  
879 Examining the microstructure of the hippocampus at fine spatial resolutions in the simplified  
880 unfolded space, as done in this study, may provide potentially useful markers of hippocampal  
881 integrity. Furthermore, we noticed relatively large radial and tangential components of diffusion  
882 mainly in CA1 and the subiculum. Future work could attempt to tease apart these two  
883 orientationally distinct populations, providing estimates which may be useful to examine  
884 microstructurally specific deterioration. Furthermore, using the same orientation methods in this  
885 study, future work should focus on capturing multiple microstructure orientations as the  
886 hippocampus contains a complex configuration of fiber orientations. Future work could also  
887 relate all the identified OPNNMF components to demographic and cognitive variables to identify  
888 if there is a relationship between variability in cognitive performance and variability in the  
889 metrics used in this study. Finally, the microstructural metrics observed in this study appear to  
890 show good separability across hippocampal subfields, suggesting they may be sensitive to the  
891 underlying cyto- and myeloarchitectonic differences.

## 892 **Acknowledgements**

893 This work was supported in part by funding provided by Brain Canada, in partnership with  
894 Health Canada, for the Canadian Open Neuroscience Platform initiative. BK is supported by a  
895 post-graduate scholarship from the Natural Sciences and Engineering Research Council of

896 Canada (NSERC). JD is supported by a postdoctoral fellowship NSERC grant. ARK was  
897 supported by the Canada Research Chairs program (#950-231964), NSERC Discovery Grant  
898 (#6639), and Canada Foundation for Innovation (CFI) John R. Evans Leaders Fund project  
899 (#37427), the Canada First Research Excellence Fund, and Brain Canada. ARK and SK were  
900 supported by a Canadian Institute for Health Research grant (CIHR Project grant #366062). SK  
901 is supported by a NSERC discovery grant (#05770). This research was enabled in part by the  
902 support provided by the Digital Research Alliance of Canada. Data were provided [in part] by  
903 the Human Connectome Project, WU-Minn Consortium (Principal Investigators: David Van  
904 Essen and Kamil Ugurbil; 1U54MH091657) funded by the 16 NIH Institutes and Centers that  
905 support the NIH Blueprint for Neuroscience Research; and by the McDonnell Center for Systems  
906 Neuroscience at Washington University.

907 **References**

- 908 Ábrahám, H., Vincze, A., Veszprémi, B., Kravják, A., Gömöri, É., Kovács, G. G., & Seress, L.  
909 (2012). Impaired myelination of the human hippocampal formation in down syndrome.  
910 *International Journal of Developmental Neuroscience*, 30(2), 147–158.  
911 <https://doi.org/10.1016/j.ijdevneu.2011.11.005>
- 912 Alexander-Bloch, A. F., Shou, H., Liu, S., Satterthwaite, T. D., Glahn, D. C., Shinohara, R. T.,  
913 Vandekar, S. N., & Raznahan, A. (2018). On testing for spatial correspondence between  
914 maps of human brain structure and function. *NeuroImage*, 178, 540–551.  
915 <https://doi.org/10.1016/j.neuroimage.2018.05.070>
- 916 Amunts, K., Lepage, C., Borgeat, L., Mohlberg, H., Dickscheid, T., Rousseau, M.-E., Bludau, S.,  
917 Bazin, P.-L., Lewis, L. B., Oros-Peusquens, A.-M., Shah, N. J., Lippert, T., Zilles, K., &  
918 Evans, A. C. (2013). Bigbrain: An ultrahigh-resolution 3d human brain model. *Science*,  
919 340(6139), 1472–1475. <https://doi.org/10.1126/science.1235381>
- 920 Andersen, P., Bliss, T. V. P., & Skrede, K. K. (1971). Lamellar organization of hippocampal  
921 excitatory pathways. *Experimental Brain Research*, 13(2).  
922 <https://doi.org/10.1007/bf00234087>
- 923 Andersson, J. L. R., & Sotiropoulos, S. N. (2015). Non-parametric representation and prediction  
924 of single- and multi-shell diffusion-weighted MRI data using Gaussian processes.  
925 *NeuroImage*, 122, 166–176. <https://doi.org/10.1016/j.neuroimage.2015.07.067>
- 926 Arshad, M., Stanley, J. A., & Raz, N. (2017). Test-retest reliability and concurrent validity of in  
927 vivo myelin content indices: Myelin water fraction and calibrated t1w/t2W image ratio.  
928 *Human Brain Mapping*, 38(4), 1780–1790. <https://doi.org/10.1002/hbm.23481>
- 929 Assaf, Y., & Basser, P. J. (2005). Composite hindered and restricted model of diffusion  
930 (charmed) MR imaging of the human brain. *NeuroImage*, 27(1), 48–58.

- 931 10.1016/j.neuroimage.2005.03.042
- 932 Assaf, Y., Blumenfeld-Katzir, T., Yovel, Y., & Basser, P. J. (2008). Axc caliber: A method for  
933 measuring Axon diameter distribution from diffusion MRI. *Magnetic Resonance in*  
934 *Medicine*, 59(6), 1347–1354. 10.1002/mrm.21577
- 935 Assaf, Y., & Cohen, Y. (2000). Assignment of the water slow-diffusing component in the central  
936 nervous system using Q-Space Diffusion MRS: Implications for Fiber Tract Imaging.  
937 *Magnetic Resonance in Medicine*, 43(2), 191–199.  
938 [https://doi.org/10.1002/\(sici\)1522-2594\(200002\)43:2<191::aid-mrm5>3.0.co;2-b](https://doi.org/10.1002/(sici)1522-2594(200002)43:2<191::aid-mrm5>3.0.co;2-b)
- 939 Basser, P. J., Mattiello, J., & LeBihan, D. (1994). Mr diffusion tensor spectroscopy and  
940 imaging. *Biophysical Journal*, 66(1), 259–267.  
941 [https://doi.org/10.1016/s0006-3495\(94\)80775-1](https://doi.org/10.1016/s0006-3495(94)80775-1)
- 942 Beaujain, J., Palomero-Gallagher, N., Boumezbeur, F., Axer, M., Bernard, J., Poupon, F., . .  
943 . Poupon, C. (2018). Post-mortem inference of the human Hippocampal connectivity  
944 and microstructure using ultra-high field diffusion MRI at 11.7 T. *Brain Structure*  
945 *and Function*, 223(5), 2157-2179.
- 946 Behrens, T., & Johansen-Berg, H. (2014). *Diffusion Mri: From quantitative measurement to*  
947 *in vivo neuroanatomy*. Elsevier.
- 948 Bendel, O., Bueters, T., Euler, M. V., Ögren, S. O., Sandin, J., & Euler, G. V. (2005).  
949 Reappearance of Hippocampal CA1 Neurons after Ischemia is Associated with  
950 Recovery of Learning and Memory. *Journal of Cerebral Blood Flow & Metabolism*,  
951 25(12), 1586-1595. 10.1038/sj.jcbfm.9600153
- 952 Blümcke, I., Coras, R., Miyata, H., & Özkara, C. (2012). Defining clinico-neuropathological  
953 subtypes of Mesial Temporal Lobe Epilepsy with hippocampal sclerosis. *Brain*  
954 *Pathology*, 22(3), 402–411. <https://doi.org/10.1111/j.1750-3639.2012.00583.x>

- 955 Boutsidis, C., & Gallopoulos, E. (2008). SVD based initialization: A head start for nonnegative  
956 matrix factorization. *Pattern Recognition*, *41*(4), 1350–1362.  
957 <https://doi.org/10.1016/j.patcog.2007.09.010>
- 958 Burggren, A. C., Zeineh, M. M., Ekstrom, A. D., Braskie, M. N., Thompson, P. M., Small, G.  
959 W., & Bookheimer, S. Y. (2008). Reduced cortical thickness in hippocampal subregions  
960 among cognitively normal apolipoprotein e E4 carriers. *NeuroImage*, *41*(4), 1177–1183.  
961 <https://doi.org/10.1016/j.neuroimage.2008.03.039>
- 962 Campbell, J. S. W., Siddiqi, K., Rymar, V. V., Sadikot, A. F., & Pike, G. B. (2005). Flow-based  
963 fiber tracking with diffusion tensor and Q-ball data: Validation and comparison to  
964 principal diffusion direction techniques. *NeuroImage*, *27*(4), 725–736.  
965 <https://doi.org/10.1016/j.neuroimage.2005.05.014>
- 966 Chase, H. W., Clos, M., Dibble, S., Fox, P., Grace, A. A., Phillips, M. L., & Eickhoff, S. B.  
967 (2015). Evidence for an anterior–posterior differentiation in the human hippocampal  
968 formation revealed by meta-analytic parcellation of fmri coordinate maps: Focus on the  
969 Subiculum. *NeuroImage*, *113*, 44–60. <https://doi.org/10.1016/j.neuroimage.2015.02.069>
- 970 Cheng, H., Zhu, H., Zheng, Q., Liu, J., & He, G. (2020). Functional parcellation of the  
971 hippocampus by semi-supervised clustering of resting state fmri data. *Scientific Reports*,  
972 *10*(1). <https://doi.org/10.1038/s41598-020-73328-1>
- 973 Cherubini, E., & Miles, R. (2015). The CA3 region of the hippocampus: How is it? What  
974 is it for? How does it do it? *Frontiers in Cellular Neuroscience*, *9*.  
975 [10.3389/fncel.2015.00019](https://doi.org/10.3389/fncel.2015.00019)
- 976 Coras, R., Milesi, G., Zucca, I., Mastropietro, A., Scotti, A., Figini, M., Mühlebner, A.,  
977 Hess, A., Graf, W., Tringali, G., Blümcke, I., Villani, F., Didato, G., Frassoni, C.,  
978 Spreafico, R., & Garbelli, R. (2014). 7T MRI features in control Human hippocampus  
979 and hippocampal sclerosis: An ex vivo study with histologic correlations. *Epilepsia*,

- 980 55(12), 2003–2016. <https://doi.org/10.1111/epi.12828>
- 981 DeKraker, J., Ferko, K., Lau, J., Köhler, S., & Khan, A. (2018). Unfolding the hippocampus: An  
982 intrinsic coordinate system for subfield segmentations and quantitative mapping.  
983 *NeuroImage*, 167, 408418. [10.1016/j.neuroimage.2017.11.054](https://doi.org/10.1016/j.neuroimage.2017.11.054)
- 984 DeKraker, J., Haast, R. A. M., Yousif, M. D., Karat, B., Lau, J. C., Köhler, S., & Khan, A. R.  
985 (2022). Automated hippocampal unfolding for morphometry and subfield segmentation  
986 with Hippunfold. *ELife*, 11. <https://doi.org/10.7554/elife.77945>
- 987 DeKraker, J., Köhler, S., & Khan, A. R. (2021). Surface-based hippocampal subfield  
988 segmentation. *Trends in Neurosciences*. <https://doi.org/10.1016/j.tins.2021.06.005>
- 989 DeKraker, J., Lau, J. C., Ferko, K. M., Khan, A. R., & Köhler, S. (2020). Hippocampal  
990 subfields revealed through unfolding and unsupervised clustering of laminar and  
991 morphological features in 3D BigBrain. *NeuroImage*, 206, 116328.  
992 <https://doi.org/10.1016/j.neuroimage.2019.116328>
- 993 Dhikav, V., & Anand, K. S. (2012). Hippocampus in health and disease: An overview. *Annals of*  
994 *Indian Academy of Neurology*, 15(4), 239. <https://doi.org/10.4103/0972-2327.104323>
- 995 Ding, S.L., & Van Hoesen, G. W. (2015). Organization and detailed parcellation of human  
996 hippocampal head and body regions based on a combined analysis of cyto- and  
997 chemoarchitecture. *Journal of Comparative Neurology*, 523(15), 2233–2253.  
998 <https://doi.org/10.1002/cne.23786>
- 999 Dinkelacker, V., Valabregue, R., Thivard, L., Lehericy, S., Baulac, M., Samson, S., &  
1000 Dupont, S. (2015). Hippocampal-thalamic wiring in medial temporal lobe epilepsy:  
1001 Enhanced connectivity per hippocampal voxel. *Epilepsia*, 56(8), 1217–1226.  
1002 <https://doi.org/10.1111/epi.13051>



- 1003 Duvernoy, H. M., Cattin, F., & Risold, P.-Y. (2013). *The human hippocampus functional*  
1004 *anatomy, vascularization and serial sections with MRI*. Springer.
- 1005 Fukutomi, H., Glasser, M. F., Murata, K., Akasaka, T., Fujimoto, K., Yamamoto, T., Autio, J.  
1006 A., Okada, T., Togashi, K., Zhang, H., Van Essen, D. C., & Hayashi, T. (2019).  
1007 Diffusion tensor model links to neurite orientation dispersion and density imaging at  
1008 high B-value in cerebral cortical gray matter. *Scientific Reports*, 9(1).  
1009 <https://doi.org/10.1038/s41598-019-48671-7>
- 1010 Fukutomi, H., Glasser, M. F., Zhang, H., Autio, J. A., Coalson, T. S., Okada, T., Togashi,  
1011 K., Van Essen, D. C., & Hayashi, T. (2018). Neurite imaging reveals  
1012 microstructural variations in human cerebral cortical gray matter. *NeuroImage*, 182,  
1013 488–499. [10.1016/j.neuroimage.2018.02.017](https://doi.org/10.1016/j.neuroimage.2018.02.017)
- 1014 Garcia, K. E., Kroenke, C. D., & Bayly, P. V. (2018). Mechanics of cortical folding: Stress,  
1015 growth and stability. *Philosophical Transactions of the Royal Society B: Biological*  
1016 *Sciences*, 373(1759), 20170321. <https://doi.org/10.1098/rstb.2017.0321>
- 1017 Garyfallidis, E., Brett, M., Amirbekian, B., Rokem, A., van der Walt, S., Descoteaux, M., &  
1018 Nimmo-Smith, I. (2014). Dipy, a library for the analysis of diffusion MRI data.  
1019 *Frontiers in Neuroinformatics*, 8. <https://doi.org/10.3389/fninf.2014.00008>
- 1020 Genon, S., Bernhardt, B. C., La Joie, R., Amunts, K., & Eickhoff, S. B. (2021). The many  
1021 dimensions of human hippocampal organization and (dys)function. *Trends in*  
1022 *Neurosciences*, 44(12), 977–989. <https://doi.org/10.1016/j.tins.2021.10.003>
- 1023 Glasser, M. F., & Van Essen, D. C. (2011). Mapping human cortical areas in vivo based on  
1024 myelin content as revealed by T1- and T2-weighted MRI. *Journal of Neuroscience*,  
1025 31(32), 11597–11616. <https://doi.org/10.1523/jneurosci.2180-11.2011>

- 1026 Glasser, M. F., Sotiropoulos, S. N., Wilson, J. A., Coalson, T. S., Fischl, B., Andersson, J. L.,  
1027 Xu, J., Jbabdi, S., Webster, M., Polimeni, J. R., Van Essen, D. C., & Jenkinson, M.  
1028 (2013).  
1029 The minimal preprocessing pipelines for the Human Connectome Project. *NeuroImage*,  
1030 *80*, 105–124. <https://doi.org/10.1016/j.neuroimage.2013.04.127>
- 1031 Glasser, M. F., Goyal, M. S., Preuss, T. M., Raichle, M. E., & Van Essen, D. C. (2014). Trends  
1032 and properties of human cerebral cortex: Correlations with cortical myelin content.  
1033 *NeuroImage*, *93*, 165–175. <https://doi.org/10.1016/j.neuroimage.2013.03.060>
- 1034 Goodroe, S. C., Starnes, J., & Brown, T. I. (2018). The Complex Nature of  
1035 Hippocampal-Striatal Interactions in Spatial Navigation. *Frontiers in Human*  
1036 *Neuroscience*, *12*. [10.3389/fnhum.2018.00250](https://doi.org/10.3389/fnhum.2018.00250)
- 1037 Grussu, F., Schneider, T., Tur, C., Yates, R. L., Tachrount, M., Ianaş, A., Yiannakas, M. C.,  
1038 Newcombe, J., Zhang, H., Alexander, D. C., DeLuca, G. C., & Gandini Wheeler-  
1039 Kingshott, C. A. (2017). ? *Annals of Clinical and Translational Neurology*, *4*(9), 663–  
1040 679. <https://doi.org/10.1002/acn3.445>
- 1041 Guerrero, J. M., Adluru, N., Bendlin, B. B., Goldsmith, H. H., Schaefer, S. M., Davidson, R. J.,  
1042 Keckskemeti, S. R., Zhang, H., & Alexander, A. L. (2019). Optimizing the fitting initial  
1043 condition for the parallel intrinsic diffusivity in NODDI: An extensive empirical  
1044 evaluation. <https://doi.org/10.1101/630541>
- 1045 Halko, N., Martinsson, P. G., & Tropp, J. A. (2011). Finding structure with randomness:  
1046 Probabilistic algorithms for constructing approximate matrix decompositions. *SIAM*  
1047 *Review*, *53*(2), 217–288. <https://doi.org/10.1137/090771806>
- 1048 Harms, R. L., Fritz, F. J., Tobisch, A., Goebel, R., & Roebroeck, A. (2017). Robust and fast  
1049 nonlinear optimization of diffusion mri microstructure models. *NeuroImage*, *155*, 82–96.  
1050 <https://doi.org/10.1016/j.neuroimage.2017.04.064>

- 1051 Horner, A. J., Bisby, J. A., Bush, D., Lin, W., & Burgess, N. (2015). Evidence for holistic  
1052 episodic recollection via hippocampal pattern completion. *Nature Communications*, 6(1).  
1053 10.1038/ncomms8462
- 1054 Isensee, F., Jaeger, P. F., Kohl, S. A., Petersen, J., & Maier-Hein, K. H. (2020). NNU-net: A  
1055 self-configuring method for deep learning-based biomedical image segmentation. *Nature*  
1056 *Methods*, 18(2), 203–211. <https://doi.org/10.1038/s41592-020-01008-z>
- 1057 Jelescu, I. O., Veraart, J., Adisetiyo, V., Milla, S. S., Novikov, D. S., & Fieremans, E. (2015).  
1058 One diffusion acquisition and different white matter models: How does microstructure  
1059 change in human early development based on WMTI and Noddi? *NeuroImage*, 107,  
1060 242–256. <https://doi.org/10.1016/j.neuroimage.2014.12.009>
- 1061 Jelescu, I. O., Veraart, J., Fieremans, E., & Novikov, D. S. (2016). Degeneracy in model  
1062 parameter estimation for multi-compartmental diffusion in neuronal tissue. *NMR in*  
1063 *Biomedicine*, 29(1), 33–47. <https://doi.org/10.1002/nbm.3450>
- 1064 Jelescu, I. O., de Skowronski, A., Geffroy, F., Palombo, M., & Novikov, D. S. (2022). Neurite  
1065 Exchange Imaging (NEXI): A minimal model of diffusion in gray matter with inter-  
1066 compartment water exchange. *NeuroImage*, 256, 119277.  
1067 <https://doi.org/10.1016/j.neuroimage.2022.119277>
- 1068 Jenkinson, M., Bannister, P., Brady, M., & Smith, S. (2002). Improved optimization for the  
1069 robust and accurate linear registration and motion correction of brain images.  
1070 *NeuroImage*, 17(2), 825–841. <https://doi.org/10.1006/nimg.2002.1132>
- 1071 Jespersen, S. N., Bjarkam, C. R., Nyengaard, J. R., Chakravarty, M. M., Hansen, B., Vosegaard,  
1072 T., Østergaard, L., Yablonskiy, D., Nielsen, N. C., & Vestergaard-Poulsen, P. (2010).  
1073 Neurite density from magnetic resonance diffusion measurements at ultrahigh field:  
1074 Comparison with light microscopy and electron microscopy. *NeuroImage*, 49(1),

- 1075 205–216. <https://doi.org/10.1016/j.neuroimage.2009.08.053>
- 1076 Jürgen M. K., Paxinos, G., Insausti, R., & Amaral, D. G. (2011). Hippocampal Formation. In *The*  
1077 *Human Nervous System* (3rd ed., pp. 871–914). Elsevier Academic Press.
- 1078 Karat., B (2023). Bradley-Karat/Hippo\_Spin\_Testing; 0.1.0 (v0.1.0). Zenodo.  
1079 <https://doi.org/10.5281/zenodo.7837990>
- 1080 Kirkby, D. L., & Higgins, G. A. (2001). Characterization of perforant path lesions in rodent  
1081 models of memory and attention. *European Journal of Neuroscience*, *10*(3), 823–838.  
1082 <https://doi.org/10.1046/j.1460-9568.1998.00087.x>
- 1083 Knierim, J. J. (2015). The hippocampus. *Current Biology*, *25*(3), R1116-R1121.
- 1084 La Joie, R., Perrotin, A., de La Sayette, V., Egret, S., Doeuvre, L., Belliard, S., Eustache, F.,  
1085 Desgranges, B., & Chételat, G. (2013). Hippocampal subfield volumetry in mild  
1086 cognitive impairment, Alzheimer's disease and semantic dementia. *NeuroImage:*  
1087 *Clinical*,  
1088 *3*, 155–162. <https://doi.org/10.1016/j.nicl.2013.08.007>
- 1089 Liu, C., Ye, F. Q., Newman, J. D., Szczupak, D., Tian, X., Yen, C. C.-C., Majka, P., Glen, D.,  
1090 Rosa, M. G., Leopold, D. A., & Silva, A. C. (2020). A resource for the detailed 3D  
1091 mapping of white matter pathways in the marmoset brain. *Nature Neuroscience*, *23*(2),  
1092 271–280. <https://doi.org/10.1038/s41593-019-0575-0>
- 1093 Maillot, J., Yahia, H., & Verroust, A. (1993). Interactive texture mapping. *Proceedings of the*  
1094 *20th Annual Conference on Computer Graphics and Interactive Techniques -*  
1095 *SIGGRAPH '93*. <https://doi.org/10.1145/166117.166120>
- 1096 Moodley, K. K., & Chan, D. (2014). The hippocampus in neurodegenerative disease. *Frontiers*  
1097 *of Neurology and Neuroscience*, 95–108. <https://doi.org/10.1159/000356430>

- 1098 Nieuwenhuys, R., Huijzen, C. van, & Voogd, J. (2008). *The human central nervous system*.  
1099 Springer.
- 1100 Nieuwenhuys, R. (2013). The myeloarchitectonic studies on the human cerebral cortex of the  
1101 Vogt-vogt school, and their significance for the interpretation of functional neuroimaging  
1102 data. *Microstructural Parcellation of the Human Cerebral Cortex*, 55–125.  
1103 [https://doi.org/10.1007/978-3-662-45766-5\\_3](https://doi.org/10.1007/978-3-662-45766-5_3)
- 1104 Novikov, D. S., Veraart, J., Jelescu, I. O., & Fieremans, E. (2018). Rotationally-invariant  
1105 mapping of scalar and orientational metrics of neuronal microstructure with diffusion  
1106 MRI. *NeuroImage*, 174, 518–538. <https://doi.org/10.1016/j.neuroimage.2018.03.006>
- 1107 Ozarslan, E., Koay, C.G., Shepherd, T., Blackband, S., & Basser, P. (2009). Simple harmonic  
1108 oscillator based reconstruction and estimation for three-dimensional q-space MRI.  
1109 *Proceedings of the International Society for Magnetic Resonance in Medicine*, 16.
- 1110 Palombo, M., Ianus, A., Guerreri, M., Nunes, D., Alexander, D. C., Shemesh, N., & Zhang, H.  
1111 (2020). SANDI: A compartment-based model for non-invasive apparent Soma and neurite  
1112 imaging by Diffusion MRI. *NeuroImage*, 215, 116835.  
1113 <https://doi.org/10.1016/j.neuroimage.2020.116835>
- 1114 Patel, R., Steele, C. J., Chen, A. G. X., Patel, S., Devenyi, G. A., Germann, J., Tardif, C. L., &  
1115 Chakravarty, M. M. (2020). Investigating microstructural variation in the human  
1116 hippocampus using non-negative matrix factorization. *NeuroImage*, 207, 116348.  
1117 <https://doi.org/10.1016/j.neuroimage.2019.116348>
- 1118 Pedregosa, F., Varoquaux, G., Gramfort, A., Michel, V., Thirion, B., Grisel, O., Blondel, M.,  
1119 Prettenhofer, P., Weiss, R., Dubourg, V., Vanderplas, J., Passos, A., Cournapeau, D.,  
1120 Brucher, M., Perrot, M., & Duchesnay, É. (2011). Scikit-learn: Machine Learning in  
1121 Python. *Journal of Machine Learning Research*, 12(85), 2825–2830.

- 1122 Pierpaoli, C., Jezzard, P., Basser, P. J., Barnett, A., & Di Chiro, G. (1996). Diffusion tensor MR  
1123 imaging of the human brain. *Radiology*, *201*(3), 637–648.  
1124 <https://doi.org/10.1148/radiology.201.3.8939209>
- 1125 Plachti, A., Eickhoff, S. B., Hoffstaedter, F., Patil, K. R., Laird, A. R., Fox, P. T., Amunts, K., &  
1126 Genon, S. (2019). Multimodal parcellations and extensive behavioral profiling tackling  
1127 the hippocampus gradient. *Cerebral Cortex*, *29*(11), 4595–4612.  
1128 <https://doi.org/10.1093/cercor/bhy336>
- 1129 Plachti, A., Kharabian, S., Eickhoff, S. B., Maleki Balajoo, S., Hoffstaedter, F., Varikuti, D. P.,  
1130 Jockwitz, C., Caspers, S., Amunts, K., & Genon, S. (2020). Hippocampus co-atrophy  
1131 pattern in dementia deviates from covariance patterns across the lifespan. *Brain*, *143*(9),  
1132 2788–2802. <https://doi.org/10.1093/brain/awaa222>
- 1133 Poppenk, J., Evensmoen, H. R., Moscovitch, M., & Nadel, L. (2013). Long-axis specialization  
1134 of the human hippocampus. *Trends in Cognitive Sciences*, *17*(5), 230–240.  
1135 <https://doi.org/10.1016/j.tics.2013.03.005>
- 1136 Qian, W., Khattar, N., Cortina, L. E., Spencer, R. G., & Bouhrara, M. (2020). Nonlinear  
1137 associations of neurite density and myelin content with age revealed using  
1138 multicomponent diffusion and relaxometry magnetic resonance imaging. *NeuroImage*,  
1139 *223*, 117369. <https://doi.org/10.1016/j.neuroimage.2020.117369>
- 1140 Quezada, S., van de Looij, Y., Hale, N., Rana, S., Sizonenko, S. V., Gilchrist, C.,  
1141 Castillo-Melendez, M., Tolcos, M., & Walker, D. W. (2020). Genetic and  
1142 microstructural differences in the cortical plate of gyri and sulci during gyrification in  
1143 fetal sheep. *Cerebral Cortex*, *30*(12), 6169–6190. <https://doi.org/10.1093/cercor/bhaa171>
- 1144 Radhakrishnan, H., Stark, S. M., & Stark, C. E. (2020). Microstructural alterations in  
1145 Hippocampal Subfields Mediate Age-related Memory decline in humans. *Frontiers in*  
1146 *Aging Neuroscience*, *12*. <https://doi.org/10.3389/fnagi.2020.00094>



- 1147 Raffelt, D. A., Tournier, J.-D., Smith, R. E., Vaughan, D. N., Jackson, G., Ridgway, G. R., &  
1148 Connelly, A. (2017). Investigating white matter fibre density and morphology using  
1149 fixel-based analysis. *NeuroImage*, *144*, 58–73.  
1150 <https://doi.org/10.1016/j.neuroimage.2016.09.029>
- 1151 Robinson, J. L., Barron, D. S., Kirby, L. A., Bottenhorn, K. L., Hill, A. C., Murphy, J. E., Katz,  
1152 J.S., Salibi, N., Eickhoff, S. B., & Fox, P. T. (2015). Neurofunctional topography of the  
1153 human hippocampus. *Human Brain Mapping*, *36*(12), 5018–5037.  
1154 <https://doi.org/10.1002/hbm.22987>
- 1155 Salmenpera, T. M., Simister, R. J., Bartlett, P., Symms, M. R., Boulby, P. A., Free, S. L.,  
1156 Barker, G. J., & Duncan, J. S. (2006). High-resolution diffusion tensor imaging of the  
1157 hippocampus in temporal lobe epilepsy. *Epilepsy Research*, *71*(2-3), 102–106.  
1158 <https://doi.org/10.1016/j.eplepsyres.2006.05.020>
- 1159 Schmierer, K., Wheeler-Kingshott, C. A. M., Boulby, P. A., Scaravilli, F., Altmann, D. R.,  
1160 Barker, G. J., Tofts, P. S., & Miller, D. H. (2007). Diffusion tensor imaging of Post  
1161 Mortem Multiple Sclerosis Brain. *NeuroImage*, *35*(2), 467–477.  
1162 <https://doi.org/10.1016/j.neuroimage.2006.12.010>
- 1163 Shepherd, T. M., Özarlan, E., Yachnis, A. T., King, M. A., & Blackband, S. J. (2007).  
1164 Diffusion Tensor Microscopy Indicates the Cytoarchitectural Basis for Diffusion  
1165 Anisotropy in the Human Hippocampus. *American Journal of Neuroradiology*, *28*(5),  
1166 958–964.
- 1167 Small, S. A., Schobel, S. A., Buxton, R. B., Witter, M. P., & Barnes, C. A. (2011). A  
1168 pathophysiological framework of hippocampal dysfunction in ageing and disease. *Nature*  
1169 *Reviews Neuroscience*, *12*(10), 585–601. <https://doi.org/10.1038/nrn3085>
- 1170 Sotiras, A., Resnick, S. M., & Davatzikos, C. (2015). Finding imaging patterns of structural  
1171 covariance via non-negative matrix factorization. *NeuroImage*, *108*, 1–16.

- 1172 <https://doi.org/10.1016/j.neuroimage.2014.11.045>
- 1173 Sotiropoulos, S. N., Moeller, S., Jbabdi, S., Xu, J., Andersson, J. L., Auerbach, E. J., Yacoub,  
1174 E., Feinberg, D., Setsompop, K., Wald, L. L., Behrens, T. E., Ugurbil, K., & Lenglet, C.  
1175 (2013). Effects of image reconstruction on fiber orientation mapping from multichannel  
1176 diffusion mri: Reducing the noise floor using sense. *Magnetic Resonance in Medicine*,  
1177 *70*(6), 1682–1689. <https://doi.org/10.1002/mrm.24623>
- 1178 Stolp, H. B., Ball, G., So, P.-W., Tournier, J.-D., Jones, M., Thornton, C., & Edwards, A. D. ]  
1179 (2018). Voxel-wise comparisons of cellular microstructure and diffusion-MRI in mouse  
1180 hippocampus using 3D bridging of optically-clear histology with neuroimaging data (3D-  
1181 bond). *Scientific Reports*, *8*(1). <https://doi.org/10.1038/s41598-018-22295-9>
- 1182 Strang, B. A., Witter, M. P., Lein, E. S., & Moser, E. I. (2014). Functional organization of the  
1183 Hippocampal Longitudinal Axis. *Nature Reviews Neuroscience*, *15*(10), 655–669.  
1184 <https://doi.org/10.1038/nrn3785>
- 1185 Swanson, L. W., Wyss, J. M., & Cowan, W. M. (1978). An autoradiographic study of the  
1186 organization of intrahippocampal association pathways in the rat. *The Journal of*  
1187 *Comparative Neurology*, *181*(4), 681–715. <https://doi.org/10.1002/cne.901810402>
- 1188 Szirmai, I., Buzsáki, G., & Kamondi, A. (2012). 120 years of hippocampal Schaffer Collaterals.  
1189 *Hippocampus*, *22*(7), 1508–1516. <https://doi.org/10.1002/hipo.22001>
- 1190 Tardif, C. L., Gauthier, C. J., Steele, C. J., Bazin, P.-L., Schäfer, A., Schaefer, A., Turner, R., &  
1191 Villringer, A. (2016). Advanced MRI techniques to improve our understanding of  
1192 experience-induced neuroplasticity. *NeuroImage*, *131*, 55–72.  
1193 <https://doi.org/10.1016/j.neuroimage.2015.08.047>
- 1194 Van Essen, D., Smith, S., Barch, D., Behrens, T., Yacoub, E., & Ugurbil, K. (2013). The  
1195 WU-Minn Human Connectome Project: An overview. *NeuroImage*, *80*(62), 62-79.

- 1196 van Uden, I. W. M., Tuladhar, A. M., van der Holst, H. M., van Leijsen, E. M. C., van  
1197 Norden, A. G. W., de Laat, K. F., Rutten-Jacobs, L. C. A., Norris, D. G., Claassen, J. A.  
1198 H. R., van Dijk, E. J., Kessels, R. P. C., & de Leeuw, F.-E. (2015). Diffusion tensor  
1199 imaging of the HIPPOCAMPUS predicts the risk of dementia; the RUN DMC study.  
1200 *Human Brain Mapping*, 37(1), 327–337. <https://doi.org/10.1002/hbm.23029>
- 1201 Voss, J. L., Bridge, D. J., Cohen, N. J., & Walker, J. A. (2017). A Closer Look at the  
1202 Hippocampus and Memory. *Trends in Cognitive Sciences*, 21(8), 577-588.  
1203 [10.1016/j.tics.2017.05.008](https://doi.org/10.1016/j.tics.2017.05.008)
- 1204 Yang, & Oja, E. (2010). Linear and nonlinear projective nonnegative matrix factorization. *IEEE*  
1205 *Transactions on Neural Networks*, 21(5), 734–749.  
1206 <https://doi.org/10.1109/tnn.2010.2041361>
- 1207 Yassa, M. A., Muftuler, L. T., & Stark, C. E. (2010). IC-P-056: Microstructural diffusion tensor  
1208 Imaging reveals perforant path degradation in aged humans in vivo. *Alzheimer's &*  
1209 *Dementia*, 6.
- 1210 Yushkevich, P. A., Wang, H., Pluta, J., Das, S. R., Craige, C., Avants, B. B., Weiner, M. W., &  
1211 Mueller, S. (2011). Nearly automatic segmentation of hippocampal subfields in in vivo  
1212 focal T2-weighted MRI. *NeuroImage*, 53(4), 1208–1224.  
1213 <https://doi.org/10.1016/j.neuroimage.2010.06.040>
- 1214 Zeineh, M. M., Holdsworth, S., Skare, S., Atlas, S. W., & Bammer, R. (2012). Ultra-high  
1215 resolution diffusion tensor imaging of the microscopic pathways of the medial temporal  
1216 lobe. *NeuroImage*, 62(3), 2065-2082.
- 1217 Zeineh, M. M., Palomero-Gallagher, N., Axer, M., Gräßel, D., Goubran, M., Wree, A., Woods,  
1218 R., Amunts, K., & Zilles, K. (2017). Direct visualization and mapping of the spatial course  
1219 of fiber tracts at microscopic resolution in the Human Hippocampus. *Cerebral Cortex*.  
1220 <https://doi.org/10.1093/cercor/bhw010>

- 1221 Zhang, H., Schneider, T., Wheeler-Kingshott, C. A., & Alexander, D. C. (2012). NODDI:  
1222 Practical in vivo neurite orientation dispersion and density imaging of the human brain.  
1223 *NeuroImage*, 61(4), 1000-1016. [10.1016/j.neuroimage.2012.03.072](https://doi.org/10.1016/j.neuroimage.2012.03.072)
- 1224 Zhong, Q., Xu, H., Qin, J., Zeng, L.-L., Hu, D., & Shen, H. (2019). Functional parcellation of the  
1225 hippocampus from resting-state dynamic functional connectivity. *Brain Research*, 1715,  
1226 165–175. <https://doi.org/10.1016/j.brainres.2019.03.023>
- 1227 Zhou, Y., Dougherty, J. H., Hubner, K. F., Bai, B., Cannon, R. L., & Hutson, R. K. (2008).  
1228 Abnormal connectivity in the posterior cingulate and hippocampus in early alzheimer's  
1229 disease and mild cognitive impairment. *Alzheimer's & Dementia*, 4(4), 265–270.  
1230 <https://doi.org/10.1016/j.jalz.2008.04.006>
